# Supplementary material for: Sagittal Synostosis and Its Association With Cognitive, Behavioral, and Psychological Functioning: A Meta-analysis
Source: PubMed Central journal article supplement (PMC8438597; doi:10.1001/jamanetworkopen.2021.21937), 2021-09-13
Supplement: jamanetwopen-e2121937-s001.pdf [file jamanetwopen-e2121937-s001.pdf]

## Supplemental Online Content

Osborn AJ, Roberts RM, Dorstyn DS, Grave BG, David DJ. Sagittal synostosis and its association with cognitive, behavioral, and psychological functioning: a meta-analysis. *JAMA Netw Open*. 2021;4(9):e2121937. doi:10.1001/jamanetworkopen.2021.21937

**eTable 1.** Electronic Search Strategy

**eTable 2.** Summary Details of the Meta-analyzed Studies

**eTable 3.** Studies Using Overlapping Samples - Combined and Treated as Non-independent Studies in the Current Meta-analysis

**eTable 4.** Data Extracted From Studies Included in the Meta-analysis (Where Reported)

**eTable 5.** Summary of the Cognitive Tests That Were Used by the Studies and Their Corresponding Cognitive Domain

**eTable 6.** Adapted NIH Quality Assessment of Observational Cohort and Cross-Sectional Studies

**eTable 7.** NIH Quality Assessment of Case-Control Studies

**eTable 8.** Prediction Intervals for Pooled Analyses With  $\geq 5$  Included Studies

**eTable 9.** Outcomes of Mixed (Conservatively Managed + Presurgical + Postsurgical) Samples of Children With Sagittal Synostosis

**eFigure 1.** Percentage of Observational Cross-Sectional and Cohort Studies Meeting Each of the Adapted NIH Study Quality Criteria ( $N_{\text{studies}} = 23$ )

**eFigure 2.** Percentage of Case-Control Studies Meeting Each of the Adapted NIH Study Quality Criteria ( $N_{\text{studies}} = 9$ )

**eFigure 3.** Outcomes of Children With Conservatively Managed Sagittal Synostosis

**eFigure 4.** Presurgical Functioning of Children With Sagittal Synostosis: Had Not Yet Undergone Surgery Prior to Being Assessed

**eFigure 5.** Outcomes of Children With Operated Sagittal Synostosis: Had Undergone Surgery Prior to Being Assessed

**eFigure 6.** Pooled Analyses for Each Cognitive, Behavioral and Psychological Domain, Partitioned According to Surgical Status (Conservatively Managed, Presurgical, Postsurgical) and Age at Assessment: A (0 – 0.11); B (1:0 – 2:11); C (3:0 – 6:11); D (7:0 – 17:11); E (>18:0)

### eReferences

This supplemental material has been provided by the authors to give readers additional information about their work.

## **eTable 1**

### *Electronic Search Strategy*

#### **Pubmed**

(craniosynostos\*[mh] OR craniosynostos\*[tw] OR sagittal[tw] OR scaphocephal\*[tw])

AND

(quality of life[tw] OR satisfaction with life[tw] OR life satisfaction[tw] OR anxiety[mh] OR anxiety[tw] OR anxious[tw] OR depression[mh] OR depress\*[tw] OR mood[tw] OR affect[tw] OR emotion\*[tw] OR psychol\*[tw] OR psychiat\*[TW] OR psychosocial[tw] OR psychopath\*[tw] OR body, physical appearance[mh] OR appearance[tw] OR function\*[tw] OR mental processes[mh] OR mental\*[tw] OR cognit\*[tw] OR neuropsychol\*[tw] OR learning[tw] OR neurodevelopment\*[tw] OR development\*[tw] OR behaviour[mh] OR behav\*[tw] OR neurobehav\*[tw] OR memory[tw] OR language[tw] OR verbal[tw] OR visuospatial[tw] OR attention[tw] OR information processing[tw] OR academic[tw] OR intellectual[tw] OR intelligen\*[tw] OR speech[tw])

#### **PsycINFO**

(craniosynostos\* or sagittal or scaphocephal\*).mp AND (outcome\* or quality of life or satisfaction with life or life satisfaction or anxiety or anxious or depress\* or mood or affect or emotion\* or psychol\* or psychiat\* or psychosocial or psychopath\* or appearance or function\* or mental\* or cognit\* or neuropsychol\* or learning or neurodevelopment\* or development\* or behav\* or neurobehav\* or memory or language or verbal or visuospatial or attention or information processing or academic or intellectual or intelligen\* or speech).mp

#### **SCOPUS**

(craniosynostos\* OR sagittal OR scaphocephal\*)

AND

(outcome\* OR “quality of life” OR “satisfaction with life” OR “life satisfaction” OR anxiety OR anxious OR depress\* OR mood OR affect OR emotion\* OR psychol\* OR psychiat\* OR psychosocial OR psychopath\* OR appearance OR function\* OR mental\* OR cognit\* OR neuropsychol\* OR learning OR neurodevelopment\* OR development\* OR behav\* OR neurobehav\* OR memory OR language OR verbal OR visuospatial OR attention OR “information processing” OR academic OR intellectual OR intelligen\* OR speech)

**Embase**

'craniofacial synostosis'/syn OR craniosynostos\* OR sagittal OR scaphocephal\*

AND

outcome OR 'quality of life'/syn OR 'satisfaction with life' OR 'life satisfaction' OR 'mental disease assessment'/syn OR 'mental disease'/syn OR 'mental function assessment'/syn OR 'physical appearance'/syn OR 'cognition'/syn OR 'individual behavior assessment'/syn OR 'behavior'/syn OR 'cognitive function test'/syn OR 'psychological and psychiatric procedures'/syn OR 'learning'/syn OR 'neuropsychology'/syn OR 'memory'/syn OR 'speech and language assessment'/syn OR 'academic achievement'/syn OR neurodevelopment\* OR development\* OR anxiety OR anxious OR depress\* OR psychol\* OR psychiat\* OR psychosocial OR psychopath\* OR appearance OR function\* OR mood OR affect OR emotion OR mental\* OR cognit\* OR neuropsychol\* OR learning OR behav\* OR neurobeh\* OR memory OR language OR verbal OR visuospatial OR attention OR intellect\* OR intelligen\* OR speech

**eTable 2**

*Summary Details of the Meta-analyzed Studies*

| Author (year)                                                                                                                                | N   | Mean age (yrs)                                                | % male | Study origin | Surgical status of patients |     |      |       | Craniosynostosis risks reported |                | Cognitive risks reported |                                       | Outcome: domain                                                                                                                                                                          |
|----------------------------------------------------------------------------------------------------------------------------------------------|-----|---------------------------------------------------------------|--------|--------------|-----------------------------|-----|------|-------|---------------------------------|----------------|--------------------------|---------------------------------------|------------------------------------------------------------------------------------------------------------------------------------------------------------------------------------------|
|                                                                                                                                              |     |                                                               |        |              | CM                          | pre | post | mixed | Genetic status                  | Family history | SES                      | Neonatal /perinatal                   |                                                                                                                                                                                          |
| Arnaud et al., 1995 <sup>1</sup>                                                                                                             | 193 | T1: 1.0<br>T2: -                                              | -      | France       | 51                          | 142 | 47   |       |                                 |                |                          | general cognition, global development |                                                                                                                                                                                          |
| Bellew et al., 2005 <sup>2</sup><br>Bellew et al., 2011 <sup>3</sup><br>Bellew et al., 2015 <sup>4</sup><br>Bellew et al., 2019 <sup>5</sup> | 67  | Surgical :<br>T1: 0.6<br>T2: 1.3<br>CM:<br>T1: 2.1<br>T2: 2.9 | 83     | UK           | 13                          | 28  | 54   | 47    |                                 |                |                          | ✓                                     | general cognition, motor functioning, verbal, visuospatial, adaptive & social skills, global development                                                                                 |
| Boltshauser et al., 2003 <sup>6</sup>                                                                                                        | 30  | 9.3                                                           | 77     | Switzerland  | 30                          |     |      |       |                                 |                | ✓                        |                                       | general cognition, verbal, visuospatial, arithmetic, attention, executive function, memory: shorter term, processing speed, quality of life, behavior: externalizing/internalizing/total |
| Byun et al., 2018 <sup>7</sup>                                                                                                               | 67  | -                                                             | 69     | Sth Korea    |                             |     |      | 67    | ✓                               |                |                          |                                       | general cognition, motor functioning                                                                                                                                                     |
| Cabrejo et al., 2019 <sup>8</sup>                                                                                                            | 10  | 12.1                                                          | 80     | US           |                             |     | 10   |       |                                 |                |                          |                                       | verbal, visuospatial                                                                                                                                                                     |
| Care et al., 2019 <sup>9</sup>                                                                                                               | 140 | 3.3                                                           | -      | UK           |                             |     | 140  |       | ✓                               |                |                          |                                       | motor functioning, verbal, adaptive & social skills, behavior: externalizing/internalizing/total                                                                                         |
| Chandler et al., 2020 <sup>10</sup>                                                                                                          | 75  | 10.3                                                          | 64     | US           |                             |     | 75   |       |                                 | ✓              | ✓                        |                                       | executive function, memory-shorter term, behavior: externalizing/internalizing/total                                                                                                     |
| Chieffo et al., 2010 <sup>11</sup>                                                                                                           | 35  | 13.4                                                          | 77     | Italy        |                             |     | 35   |       | ✓                               |                | ✓                        |                                       | visuospatial, processing speed                                                                                                                                                           |
| Chieffo et al., 2020 <sup>12</sup>                                                                                                           | 87  | T1: 0.5<br>T2: 1.2                                            | -      | Italy        |                             | 87  | 63   |       |                                 |                |                          |                                       | global development, motor functioning, verbal, visuospatial, adaptive & social skills                                                                                                    |
| Chuang et al., 2018 <sup>13</sup>                                                                                                            | 9   | 0.4                                                           | -      | US           |                             | 9   |      |       |                                 |                |                          | ✓                                     | general cognition, verbal                                                                                                                                                                |

|                                                                                                                                                                                                                                                                                                                                                                                                                                                                                                                                       |    |                                          |    |           |   |    |    |  |   |  |   |   |                                                                                                                                                                                                                      |
|---------------------------------------------------------------------------------------------------------------------------------------------------------------------------------------------------------------------------------------------------------------------------------------------------------------------------------------------------------------------------------------------------------------------------------------------------------------------------------------------------------------------------------------|----|------------------------------------------|----|-----------|---|----|----|--|---|--|---|---|----------------------------------------------------------------------------------------------------------------------------------------------------------------------------------------------------------------------|
| Chuang et al., 2021 <sup>14</sup>                                                                                                                                                                                                                                                                                                                                                                                                                                                                                                     | 47 | -                                        | -  | US        |   |    | 47 |  |   |  |   |   | general cognition, verbal, visuospatial, motor functioning, executive function, behaviour: externalizing/internalizing                                                                                               |
| Da Costa et al., 2006 <sup>15</sup>                                                                                                                                                                                                                                                                                                                                                                                                                                                                                                   | 6  | -                                        | -  | Australia |   |    | 6  |  |   |  | ✓ |   | general cognition                                                                                                                                                                                                    |
| Da Costa et al., 2012 <sup>16</sup><br>Da Costa et al., 2013 <sup>17</sup>                                                                                                                                                                                                                                                                                                                                                                                                                                                            | 26 | T1: 0.7<br>T2: 1.8                       | 88 | Australia |   | 26 | 26 |  |   |  | ✓ | ✓ | general cognition, motor functioning                                                                                                                                                                                 |
| Engel et al., 2012 <sup>18</sup>                                                                                                                                                                                                                                                                                                                                                                                                                                                                                                      | 46 | -                                        | 80 | Germany   |   | 46 |    |  |   |  |   |   | global development                                                                                                                                                                                                   |
| Gewalli et al., 2001 <sup>19</sup>                                                                                                                                                                                                                                                                                                                                                                                                                                                                                                    | 26 | T1: 0.5<br>T2: 1.4                       | 81 | Sweden    |   | 26 | 26 |  |   |  |   |   | motor functioning, verbal, visuospatial, adaptive & social skills, global development                                                                                                                                |
| Hashim et al., 2014 <sup>20</sup><br>Patel et al., 2014 <sup>21</sup>                                                                                                                                                                                                                                                                                                                                                                                                                                                                 | 70 | 10.0                                     | -  | US        |   |    | 70 |  |   |  | ✓ |   | general cognition, motor functioning, verbal, visuospatial, learning difficulties, behavior: externalizing/internalizing/total, memory: shorter term                                                                 |
| Imahiyerobo et al., 2019 <sup>22</sup>                                                                                                                                                                                                                                                                                                                                                                                                                                                                                                | 77 | 0.4                                      | 78 | US        |   | 77 |    |  |   |  | ✓ | ✓ | general cognition, motor functioning, verbal                                                                                                                                                                         |
| Infant Learning Project<br>Kapp-Simon et al., 2005 <sup>23</sup><br>Ruiz-Correa et al., 2007 <sup>24</sup><br>Speltz et al., 2007 <sup>25</sup><br>Starr et al., 2007 <sup>26</sup><br>Toth et al., 2008 <sup>27</sup><br>Naumann et al., 2012 <sup>28</sup><br>Starr et al., 2012 <sup>29</sup><br>Cradock et al., 2015 <sup>30</sup><br>Speltz et al., 2015 <sup>31</sup><br>Speltz et al., 2016 <sup>32</sup><br>Kapp-Simon et al., 2016 <sup>33</sup><br>Collett et al., 2017 <sup>34</sup><br>Wallace et al., 2016 <sup>35</sup> | 94 | T1: 0.5<br>T2: 1.5<br>T3: 3.0<br>T4: 7.0 | 83 | US        |   | 62 | 94 |  | ✓ |  | ✓ | ✓ | general cognition, motor functioning, verbal, visuospatial, arithmetic, attention, executive function, learning difficulties, memory: shorter term, memory: longer term, behavior: externalizing/internalizing/total |
| Kapp-Simon et al., 1993 <sup>36</sup><br>Kapp-Simon et al., 1998 <sup>37</sup>                                                                                                                                                                                                                                                                                                                                                                                                                                                        | 24 | T1: 0.7<br>T2: 1.5<br>T3: 4.2            | 86 | US        | 4 | 20 | 20 |  |   |  |   |   | general cognition, learning difficulties                                                                                                                                                                             |
| Kljajic et al., 2019 <sup>38</sup><br>Kljajic et al., 2020 <sup>39</sup>                                                                                                                                                                                                                                                                                                                                                                                                                                                              | 41 | 11.5                                     | 68 | Sweden    |   |    | 41 |  |   |  |   | ✓ | general cognition, verbal, visuospatial, attention, memory: shorter term, processing speed                                                                                                                           |

|                                                                  |    |      |    |           |  |    |    |    |   |  |  |   |                                                                                                                |                                                                          |
|------------------------------------------------------------------|----|------|----|-----------|--|----|----|----|---|--|--|---|----------------------------------------------------------------------------------------------------------------|--------------------------------------------------------------------------|
| Korpilahti et al., 2012 <sup>40</sup>                            | 18 | 3.4  | 90 | Finland   |  |    | 18 |    |   |  |  | ✓ | verbal                                                                                                         |                                                                          |
| Lee et al., 2015 <sup>41</sup><br>Lee et al., 2017 <sup>42</sup> | 37 | -    | 75 | Sth Korea |  | 37 | 25 |    | ✓ |  |  |   | general cognition, motor functioning,                                                                          |                                                                          |
| Magge et al., 2002 <sup>43</sup>                                 | 16 | 10.3 | -  | US        |  |    | 16 |    |   |  |  |   | learning difficulties                                                                                          |                                                                          |
| Mazzaferro et al., 2018 <sup>44</sup>                            | 5  | -    | -  | US        |  |    | 5  |    |   |  |  |   | quality of life                                                                                                |                                                                          |
| Moreno-Villagomez et al., 2020 <sup>45</sup>                     | 10 | 4.5  | 80 | Mexico    |  |    | 10 |    |   |  |  |   | general cognition, motor functioning, verbal, visuospatial, arithmetic, memory: shorter term, processing speed |                                                                          |
| Noetzel et al., 1985 <sup>46</sup>                               | 3  | -    | -  | US        |  |    |    | 3  |   |  |  |   | general cognition                                                                                              |                                                                          |
| Salokorpi et al., 2018 <sup>47</sup>                             | 40 | 27.4 | 63 | Finland   |  |    | 40 |    |   |  |  |   | satisfaction with appearance                                                                                   |                                                                          |
| Scheuerle et al., 2004 <sup>48</sup>                             | 3  | -    | -  | US        |  | 3  | 3  |    |   |  |  |   | verbal                                                                                                         |                                                                          |
| Shipster et al., 2003 <sup>49</sup>                              | 76 | 0.4  | 80 | UK        |  |    |    | 76 |   |  |  | ✓ | ✓                                                                                                              | general cognition, verbal, visuospatial, learning difficulties           |
| Speltz et al., 1993 <sup>50</sup>                                | 7  | 5.8  | 86 | US        |  |    | 7  |    |   |  |  | ✓ |                                                                                                                | behavior: externalizing/internalizing/total, self-concept                |
| Speltz et al., 1997 <sup>51</sup>                                | 19 | 0.3  | -  | US        |  | 18 | 19 |    |   |  |  |   |                                                                                                                | general cognition, motor functioning                                     |
| Virtanen et al., 1999 <sup>52</sup>                              | 18 | 12.2 | 72 | Finland   |  |    | 18 |    |   |  |  |   |                                                                                                                | motor functioning, verbal, visuospatial, attention, memory: shorter term |

Note: N = sagittal synostosis participants; descriptive statistics reflect non-syndromic metopic synostosis patient details extracted from each paper; data from non-independent papers combined & treated as a single study in analyses as appropriate. Study details above refer to the *specific* sagittal sample data extracted from each study & used in the current meta-analysis (which may differ from overall study details)

**eTable 3**

*Studies Using Overlapping Samples - Combined and Treated as Non-independent Studies in the Current Meta-analysis*

| Study 'name' in meta-analysis | Papers using overlapping samples      |
|-------------------------------|---------------------------------------|
|                               |                                       |
| Bellew 2005/2011/2015/2019    | Bellew et al, 2005 <sup>2</sup>       |
|                               | Bellew et al, 2011 <sup>3</sup>       |
|                               | Bellew et al, 2015 <sup>4</sup>       |
|                               | Bellew et al, 2019 <sup>5</sup>       |
|                               |                                       |
| Da Costa 2012/2013            | Da Costa et al, 2012 <sup>16</sup>    |
|                               | Da Costa et al, 2013 <sup>17</sup>    |
|                               |                                       |
| Hashim 2014/Patel 2014        | Patel et al, 2014 <sup>21</sup>       |
|                               | Hashim et al, 2014 <sup>20</sup>      |
|                               |                                       |
| Infant Learning Project (ILP) | Collett et al, 2017 <sup>34</sup>     |
|                               | Cradock et al, 2015 <sup>30</sup>     |
|                               | Kapp-Simon et al, 2005 <sup>23</sup>  |
|                               | Kapp-Simon et al, 2016 <sup>33</sup>  |
|                               | Naumann et al, 2012 <sup>28</sup>     |
|                               | Ruiz-Correa et al, 2007 <sup>24</sup> |
|                               | Speltz et al, 2007 <sup>25</sup>      |
|                               | Speltz et al, 2015 <sup>31</sup>      |
|                               | Speltz et al, 2016 <sup>32</sup>      |
|                               | Starr et al, 2007 <sup>26</sup>       |
|                               | Starr et al, 2012 <sup>29</sup>       |
|                               | Toth et al, 2008 <sup>27</sup>        |
|                               | Wallace et al, 2016 <sup>35</sup>     |
|                               |                                       |
| Kapp-Simon 1993/1998          | Kapp-Simon et al, 1993 <sup>36</sup>  |
|                               | Kapp-Simon et al, 1998 <sup>37</sup>  |
|                               |                                       |
| Kljajic 2019/2020             | Kljajic et al, 2019 <sup>38</sup>     |
|                               | Kljajic et al, 2020 <sup>39</sup>     |
|                               |                                       |
| Lee 2015/2017                 | Lee et al, 2015 <sup>41</sup>         |
|                               | Lee et al, 2017 <sup>42</sup>         |

**eTable 4**

*Data Extracted From Studies Included in the Meta-analysis (Where Reported)*

- Article title, year and authors
- Sample size
- Country of origin
- Age at assessment
- Sex
- Type of craniosynostosis
- Surgical status
- Type of surgical treatment
- Age at surgery
- Number of surgeries
- Criteria for surgery
- Length of post-surgery follow-up
- Sagittal synostosis diagnosis confirmation
- Status of genetic disorders
- Socio-economic status
- Family history of craniosynostosis
- Method of identification and recruitment
- Outcome
- Measures
- Outcome data



**eTable 5**

*Summary of the Cognitive Tests That Were Used by the Studies and Their Corresponding Cognitive Domain*

| <b>Domain</b>                      | <b>Test</b>                                                                                                                                                                                                                                                                                                                                                                                                                                                                                                                                                                                                                                                                                                                                                                                                                                                                                                                                                                           |
|------------------------------------|---------------------------------------------------------------------------------------------------------------------------------------------------------------------------------------------------------------------------------------------------------------------------------------------------------------------------------------------------------------------------------------------------------------------------------------------------------------------------------------------------------------------------------------------------------------------------------------------------------------------------------------------------------------------------------------------------------------------------------------------------------------------------------------------------------------------------------------------------------------------------------------------------------------------------------------------------------------------------------------|
| General cognition                  | BSID, BSID-II, BSID-III: mental development index, cognitive scale<br>McCarthy's Scale of Children's Abilities: general cognitive index<br>K-ABC: IQ<br>WPPSI-III, WPPSI-R-UK, WISC-III, WISC-IV, WASI, WAIS-R: FSIQ<br>Brunet-Lezine; Nouvelle Echelle Metrique de L'Intelligence<br>Cattell Infant Intelligence Scale; Stanford-Binet Intelligence Scale                                                                                                                                                                                                                                                                                                                                                                                                                                                                                                                                                                                                                            |
| Verbal Functions & Language Skills | British Picture Vocabulary Scale<br>BSID, BSID-III: language , receptive, expressive<br>CTOPP: phonological awareness composite<br>Denver Developmental Screening Test: language<br>Griffiths Mental Development Scale: hearing & speech/language<br>NEPSY-II: Word generation (semantic, initial letter)<br>PLS-3: receptive, expressive<br>Renfrew Action Picture Test: grammar, information<br>Renfrew Word Finding Vocabulary Scale<br>Clinical Evaluation of Language Fundamentals: expressive, receptive<br>Reynell Scales: receptive, expressive<br>Token Test-II<br>TOWRE: total words<br>WPPSI-III, WPPSI-R-UK, WISC-III, WISC-III-UK, WISC-IV, WISC-R, WASI, WAIS-R: Verbal Comprehension Index, Verbal IQ, general language composite, information, vocabulary, similarities<br>WRAT-4: reading composite, spelling<br>Wechsler Fundamentals: reading-related<br><br><i>Subjective/proxy-rated:</i><br><i>ASQ-3: Communication; CCC-2: general communication composite</i> |
| Motor functioning                  | Beery-VMI: total, motor co-ordination index<br>BSID, BSID-II, BSID-III: psychomotor development index, fine motor, gross motor<br>Griffiths Mental Development Scale: locomotor, eye/hand co-ordination<br>Purdue Pegboard Test: preferred, non-preferred, both, assembly<br>WPPSI-III: motor index<br><br><i>Subjective/proxy-rated:</i><br><i>ASQ-3: gross motor skills; fine motor skills</i>                                                                                                                                                                                                                                                                                                                                                                                                                                                                                                                                                                                      |
| Visuospatial                       | Beery-VMI: visual perception<br>Developmental Test of Visual Perception-2: motor-reduced visual perception index, visual closure<br>Griffiths Mental Development Scale: performance<br>Hooper Visual Organisation Test<br>NEPSY-II: arrows<br>Rey Complex Figure Test<br>WPPSI-III, WPPSI-R-UK, WISC-III, WISC-III-UK, WISC-R, WISC-IV, WASI, WAIS-R: Performance IQ, Perceptual Reasoning Index, perceptual organisation, picture arrangement, picture completion, object assembly, block design<br>Design fluency (5 point test)                                                                                                                                                                                                                                                                                                                                                                                                                                                    |

|                              |                                                                                                                                                                                                                                     |
|------------------------------|-------------------------------------------------------------------------------------------------------------------------------------------------------------------------------------------------------------------------------------|
| Attention                    | CCPT-3: C, detectability, omissions, commissions, perseveration, HRT, HRT-SD, Variability, HRT-BC, HRT-iC                                                                                                                           |
|                              | Corsi Block Tapping Test                                                                                                                                                                                                            |
|                              | K-ABC: sequential processing index, hand movements, number recall                                                                                                                                                                   |
|                              | Mottier Test                                                                                                                                                                                                                        |
|                              | TAP: alertness tonic, alertness phasic, Go/Nogo (selective attention), divided attention, sustained attention                                                                                                                       |
|                              | TEA-Ch: sky search, score!, sky search DT, score DT                                                                                                                                                                                 |
|                              | WISC-III, WISC-IV, WISC-R, WAIS-R: digit span, digits forward, letter-number sequencing, freedom from distractibility                                                                                                               |
|                              |                                                                                                                                                                                                                                     |
| Processing speed             | WPPSI-III, WISC-III, WISC-IV, WAIS-R: processing speed index, processing speed quotient, coding, digit symbol, symbol search                                                                                                        |
|                              |                                                                                                                                                                                                                                     |
| Executive Function           | NEPSY-II: Inhibition                                                                                                                                                                                                                |
|                              | Stroop test                                                                                                                                                                                                                         |
|                              |                                                                                                                                                                                                                                     |
| Arithmetic                   | McCarthy Scale of Children's Abilities: quantitative index                                                                                                                                                                          |
|                              | K-ABC: arithmetic                                                                                                                                                                                                                   |
|                              | WRAT-4: math computation                                                                                                                                                                                                            |
|                              | Wechsler Fundamentals: numerical operations                                                                                                                                                                                         |
|                              |                                                                                                                                                                                                                                     |
| Memory – short-term          | Benton's Visual Retention: Multiple Choice Form                                                                                                                                                                                     |
|                              | McCarthy Scale of Children's Abilities: memory scale                                                                                                                                                                                |
|                              | CMS: stories (immediate, immediate thematic); word lists (learning)                                                                                                                                                                 |
|                              | Rey Visual Design Learning Test: immediate memory span, new learning ability, memory                                                                                                                                                |
|                              | Verbal learning + memory test (VLMT): immediate memory span, susceptibility to interference                                                                                                                                         |
|                              | WISC-IV: working memory index                                                                                                                                                                                                       |
|                              |                                                                                                                                                                                                                                     |
| Memory – longer-term         | CMS: stories (delayed, delayed recognition, delayed thematic); word lists (delayed, delayed recognition)                                                                                                                            |
|                              | CTOPP: rapid naming composite                                                                                                                                                                                                       |
|                              |                                                                                                                                                                                                                                     |
| Global development           | BSID-II, BSID-III: mental/motor developmental delays, developmental delays                                                                                                                                                          |
|                              | Griffiths Mental Development Scale: general quotient, global development quotient                                                                                                                                                   |
|                              | Developmental Brunet-Lezine Scale                                                                                                                                                                                                   |
|                              |                                                                                                                                                                                                                                     |
| Learning/literacy problems   | reading-related learning disability, mathematic-related learning disability, reading learning disability, spelling learning disability, literacy impairment, learning problems (<25 <sup>th</sup> percentile on standardized tests) |
|                              |                                                                                                                                                                                                                                     |
|                              | <b><i>Subjective/proxy-rated behavioral and psychological measures</i></b>                                                                                                                                                          |
|                              |                                                                                                                                                                                                                                     |
| Behavior                     | ASEBA/CBCL externalizing index, internalizing index                                                                                                                                                                                 |
|                              | Behavior Assessment System for Children - 2: externalizing index, internalizing index                                                                                                                                               |
|                              | Strengths & Difficulties Questionnaire: externalizing, internalizing                                                                                                                                                                |
|                              |                                                                                                                                                                                                                                     |
| Adaptive /functional/ social | Ages & Stages Questionnaire-3: personal-social, problem solving                                                                                                                                                                     |
|                              | Strengths & Difficulties Questionnaire: prosocial                                                                                                                                                                                   |
|                              | Griffiths Mental Development Scale: personal-social                                                                                                                                                                                 |
|                              | Behavior Assessment System for Children - 2: adaptive skills index                                                                                                                                                                  |
|                              |                                                                                                                                                                                                                                     |
| Satisfaction with Appearance | Visual analog scale                                                                                                                                                                                                                 |
|                              |                                                                                                                                                                                                                                     |

|                       |                                                                                                                               |
|-----------------------|-------------------------------------------------------------------------------------------------------------------------------|
| Self-concept          | Method used by Eder                                                                                                           |
| Quality of Life       | TACQOL: EMOPOS, EMONEG, body, motor, auto, cognition, social<br>WHOQOL: physical health, psychological, social, environmental |
| Attention             | ASEBA/CBCL: parent/teacher                                                                                                    |
| Executive function    | BRIEF: behavioural regulation index, metacognition index, global executive composite                                          |
| Memory - shorter-term | BRIEF: working memory                                                                                                         |

Note: all cognitive measures are categorised in meta-analyses as ‘objective’ except where noted above; general cognition = test scores on measures of IQ; global developmental delay = poor developmental progress in multiple domains (e.g cognition, language, motor skills); BSID = Bayley Scales of Infant Development; K-ABC = Kaufman Assessment Battery for Children; WASI: Wechsler Abbreviated Scale Intelligence; WPPSI: Wechsler Preschool and Primary Scale of Intelligence; WISC = Wechsler Intelligence Scale for Children; WAIS = Wechsler Adult Intelligence Scale; CTOPP = Comprehensive Test of Phonological Processing; WRAT-4 = Wide Range Achievement Test 4; TOWRE = Test of Word Reading Efficiency; PLS = Preschool Language Scale; NEPSY-II = A Developmental Neuropsychological Assessment; CCC-2 = Children’s Communication Checklist-2; Tea-CH = Test of Everyday Attention in Children; BRIEF = Behavioral Rating Inventory of Executive Function; CMS = Children’s Memory Scale; Beery-VMI = Beery-Buktenica Test of Visual-Motor Integration; ASQ = Ages & Stages Questionnaire ; CCPT = Connor’s Continuous Performance Test; TAP = Tests for Attentional Performance; ASEBA = Achenbach System of Empirically Based Assessment; CBCL = Child Behavior Checklist; TACQOL = TNO AZL Children’s Quality of Life; WHOQOL = World Health Organization Quality of Life.

**eTable 6**

*Adapted NIH Quality Assessment of Observational Cohort and Cross-Sectional Studies*

| Study (lead author, year)                    | Item 1 | Item 2 | Item 3 | Item 4a | Item 4b | Item 5 | Item 6 | Item 7 | Item 8 | Item 9 | Item 10 | Item 11 |
|----------------------------------------------|--------|--------|--------|---------|---------|--------|--------|--------|--------|--------|---------|---------|
| Arnaud 1995 <sup>1</sup>                     | Y      | N      | Y      | Y       | Y       | N      | Y      | N      | N      | NR     | NA      | N       |
| Bellew 2005, 2011, 2015, 2019 <sup>2-5</sup> | Y      | Y      | NR     | Y       | N       | N      | Y      | Y      | Y      | NR     | N       | N       |
| Byun 2018 <sup>7</sup>                       | N      | N      | NR     | Y       | Y       | N      | Y      | N      | Y      | NR     | NA      | N       |
| Care 2019 <sup>9</sup>                       | N      | Y      | Y      | Y       | Y       | N      | Y      | Y      | Y      | NR     | NA      | N       |
| Chandler 2020 <sup>10</sup>                  | Y      | N      | NR     | NR      | Y       | N      | Y      | Y      | Y      | NR     | NA      | Y       |
| Chieffo 2020 <sup>12</sup>                   | Y      | N      | Y      | NR      | N       | N      | Y      | Y      | N      | NR     | N       | N       |
| Chuang 2021 <sup>13</sup>                    | Y      | Y      | N      | Y       | Y       | N      | Y      | Y      | Y      | NR     | NA      | Y       |
| Da Costa 2006 <sup>15</sup>                  | Y      | N      | NR     | NR      | Y       | N      | Y      | Y      | Y      | NR     | NA      | Y       |
| Da Costa 2012/2013 <sup>16,17</sup>          | Y      | N      | Y      | NR      | Y       | N      | Y      | Y      | Y      | NR     | NA      | N       |
| Engel 2012 <sup>18</sup>                     | Y      | Y      | NR     | Y       | Y       | N      | Y      | Y      | Y      | NR     | NA      | N       |
| Gewalli 2001 <sup>19</sup>                   | Y      | Y      | NR     | Y       | N       | N      | Y      | Y      | Y      | NR     | Y       | N       |
| Hashim 2014 / Patel 2014 <sup>20,21</sup>    | Y      | Y      | Y      | Y       | Y       | N      | Y      | Y      | Y      | NR     | NA      | Y       |
| Imahiyerobo 2019 <sup>22</sup>               | Y      | Y      | Y      | Y       | N       | N      | Y      | N      | Y      | NR     | NA      | Y       |
| Kapp-Simon 1993/1998 <sup>36,37</sup>        | Y      | N      | Y      | Y       | Y       | N      | Y      | Y      | Y      | NR     | N       | N       |
| Kljajic 2019/2020 <sup>38,39</sup>           | Y      | Y      | Y      | Y       | Y       | N      | Y      | Y      | Y      | NR     | NA      | Y       |
| Korpilahti 2012 <sup>40</sup>                | Y      | N      | NR     | NR      | Y       | N      | Y      | Y      | Y      | NR     | NA      | N       |
| Lee 2015 / 2017 <sup>41,42</sup>             | Y      | N      | NR     | Y       | N       | N      | Y      | Y      | Y      | NR     | N       | N       |
| Magge 2002 <sup>43</sup>                     | Y      | Y      | N      | Y       | Y       | N      | Y      | Y      | Y      | NR     | NA      | N       |
| Mazzaferro 2018 <sup>44</sup>                | Y      | N      | N      | NR      | Y       | N      | Y      | Y      | Y      | NR     | NA      | Y       |
| Moreno-Villagomez 2020 <sup>45</sup>         | Y      | N      | NR     | NR      | Y       | N      | Y      | Y      | Y      | NR     | NA      | N       |
| Noetzel 1985 <sup>46</sup>                   | N      | N      | NR     | Y       | N       | N      | Y      | N      | N      | NR     | NA      | N       |
| Scheuerle 2004 <sup>48</sup>                 | N      | N      | NR     | N       | N       | N      | Y      | Y      | N      | NR     | NA      | N       |
| Shipster 2003 <sup>49</sup>                  | Y      | Y      | Y      | Y       | Y       | N      | Y      | Y      | Y      | NR     | NA      | N       |

NIH = National Institutes of Health; Y = yes; N = no; NR = not reported; NA = not applicable

1. Was the research question or objective in this paper clearly stated?
2. Was the study population clearly specified & defined (including demographics, location and time period)?
3. Was the participation rate of eligible persons at least 50%?
4. Were all the subjects selected or recruited from the same or similar populations (including the same time period)?
5. Were inclusion and exclusion criteria for being in the study prespecified, reported and applied uniformly to all participants?
6. Was a sample size justification, power description, or variance and effect estimates provided?
7. Was sagittal synostosis diagnosed prior to the outcome(s) being measured?

8. Was the diagnosis of sagittal synostosis (independent variable) clearly defined, valid, reliable, and implemented consistently across all study participants?
9. Were the outcome measures (dependent variables) clearly defined, valid, reliable, and implemented consistently across all study participants?
10. Were the outcome assessors blinded to the exposure status of participants?
11. Was loss to follow-up after baseline 20% or less?
12. Were key potential confounding variables measured and adjusted statistically for their impact on the relationship between exposure(s) and outcome(s)?

**eTable 7***NIH Quality Assessment of Case-Control Studies*

| Study (lead author, year)                | Item 1 | Item 2 | Item 3 | Item 4 | Item 5 | Item 6 | Item 7 | Item 8 | Item 9 | Item 10 | Item 11 | Item 12a | Item 12b | Item 12c |
|------------------------------------------|--------|--------|--------|--------|--------|--------|--------|--------|--------|---------|---------|----------|----------|----------|
| Boltshauser, 2003 <sup>6</sup>           | Y      | N      | N      | NR     | NR     | Y      | NR     | NR     | Y      | Y       | NR      | N        | N        | NA       |
| Cabrejo, 2019 <sup>8</sup>               | Y      | N      | N      | NR     | Y      | Y      | NR     | NR     | Y      | Y       | NR      | N        | Y        | N        |
| Chieffo, 2010 <sup>11</sup>              | Y      | N      | N      | NR     | NR     | Y      | NR     | NR     | Y      | Y       | NR      | N        | Y        | N        |
| Chuang, 2018 <sup>13</sup>               | N      | N      | N      | NR     | NR     | Y      | NR     | NR     | Y      | N       | NR      | N        | N        | NA       |
| Infant Learning Project <sup>23-37</sup> | Y      | Y      | N      | Y      | Y      | Y      | NR     | NR     | Y      | Y       | NR      | Y        | Y        | Y        |
| Salokorpi, 2018 <sup>47</sup>            | Y      | Y      | N      | Y      | Y      | Y      | NR     | NR     | Y      | N       | NR      | N        | Y        | N        |
| Speltz, 1993 <sup>50</sup>               | Y      | N      | N      | NR     | NR     | Y      | NR     | NR     | Y      | Y       | NR      | Y        | Y        | NR       |
| Speltz, 1997 <sup>51</sup>               | Y      | N      | N      | NR     | Y      | Y      | NR     | NR     | Y      | Y       | NR      | Y        | Y        | Y        |
| Virtanen, 1999 <sup>52</sup>             | Y      | Y      | N      | Y      | Y      | Y      | NR     | NR     | Y      | Y       | NR      | N        | Y        | N        |

NIH = National Institutes of Health; Y = yes; N = no; NR = not reported; NA = not applicable

1. Was the research question or objective in this paper clearly stated & appropriate?
2. Was the study population clearly specified & defined (including details of demographics, time period, location)?
3. Did the authors include a sample size justification?
4. Were controls selected or recruited from the same or similar population that gave rise to the cases (including the same timeframe)?
5. Were the definitions, inclusion and exclusion criteria, algorithms or processes used to identify or select cases and controls valid, reliable, and implemented consistently across all study participants?
6. Were the cases clearly defined and differentiated from controls?
7. If less than 100 percent of eligible cases and/or controls were selected for the study, were the cases and/or controls randomly selected from those eligible?
8. Was there use of concurrent controls?
9. Was the diagnosis of sagittal synostosis clearly defined, valid, reliable, and implemented consistently (including the same time period) across all study participants?
10. Were the outcome measures (dependent variables) clearly defined, valid, reliable, and implemented consistently across participants?
11. Were the assessors of outcomes blinded to the case or control status of participants?
12. Were key potential confounding variables measured and adjusted statistically in the analyses?
13. Were cases and controls matched?
14. If matching was used, did the investigators account for matching during study analysis?

**eTable 8**

*Prediction Intervals for Pooled Analyses With  $\geq 5$  Included Studies*

| Post-surgical domain     | No. of studies | Mean $g_w$ | CI (95%) lower limit | CI (95%) upper limit | PI (95%) lower limit | PI (95%) upper limit | -1.0 | -0.5 | 0 | 0.5 | 1.0 |
|--------------------------|----------------|------------|----------------------|----------------------|----------------------|----------------------|------|------|---|-----|-----|
| General cognition: norms | 9              | 0.01       | -0.26                | 0.27                 | -0.86                | 0.87                 |      |      |   |     |     |
| Motor functioning: norms | 7              | 0.01       | -0.31                | 0.34                 | -1.09                | 1.12                 |      |      |   |     |     |
| Verbal abilities: norms  | 7              | 0.23       | -.01                 | 0.47                 | -0.51                | 0.97                 |      |      |   |     |     |
| Visuospatial: norms      | 6              | 0.31       | 0.18                 | 0.44                 | 0.12                 | 0.49                 |      |      |   |     |     |

Note: CI = confidence intervals; PI = prediction intervals

**eTable 9**

*Outcomes of Mixed (Conservatively Managed + Presurgical + Postsurgical) Samples of Children With Sagittal Synostosis*

| <b>COMBINED SAMPLES (combined conservatively managed, pre- and post-surgery participants)</b> |                                     |                            |                       |                  |                     |                     |            |                      |            |                       |                            |                       |                            |                            |                       |                                              |
|-----------------------------------------------------------------------------------------------|-------------------------------------|----------------------------|-----------------------|------------------|---------------------|---------------------|------------|----------------------|------------|-----------------------|----------------------------|-----------------------|----------------------------|----------------------------|-----------------------|----------------------------------------------|
|                                                                                               | Standardized Mean Group Differences |                            |                       |                  |                     |                     |            |                      |            |                       | Prevalence rates           |                       |                            |                            |                       |                                              |
| <i>Domain</i>                                                                                 | <i>Comparison data</i>              | <i>N<sub>studies</sub></i> | <i>N<sub>SS</sub></i> | <i>Hedges' g</i> | <i>Lower 95% CI</i> | <i>Upper 95% CI</i> | <i>p</i>   | <i>I<sup>2</sup></i> | <i>tau</i> | <i>N<sub>fs</sub></i> | <i>N<sub>studies</sub></i> | <i>N<sub>SS</sub></i> | <i>Prevalence (95% CI)</i> | <i>N<sub>studies</sub></i> | <i>N<sub>SS</sub></i> | <i>Odds ratio (95% CI) logarithmic scale</i> |
| General cognition                                                                             | norms                               | 3                          | 185                   | -.33             | -1.17               | .51                 | .44        | 95.08                | .72        | 2                     | 2                          | 73                    | 0.20 (0.12 – 0.30)         |                            |                       |                                              |
| Motor functioning                                                                             | norms                               | 1                          | 67                    | -.93             | -1.18               | -.69                | <b>.00</b> | -                    | -          | -                     |                            |                       |                            |                            |                       |                                              |
| Verbal abilities                                                                              | norms                               | 2                          | 123                   | .12              | -.24                | .49                 | .51        | 47.63                | .19        | 0                     | 1                          | 76                    | 0.37 (0.27 – 0.48)         |                            |                       |                                              |
| Visuospatial abilities                                                                        | norms                               | 2                          | 84                    | -.03             | -.50                | .44                 | .90        | 65.53                | .28        | 0                     |                            |                       |                            |                            |                       |                                              |



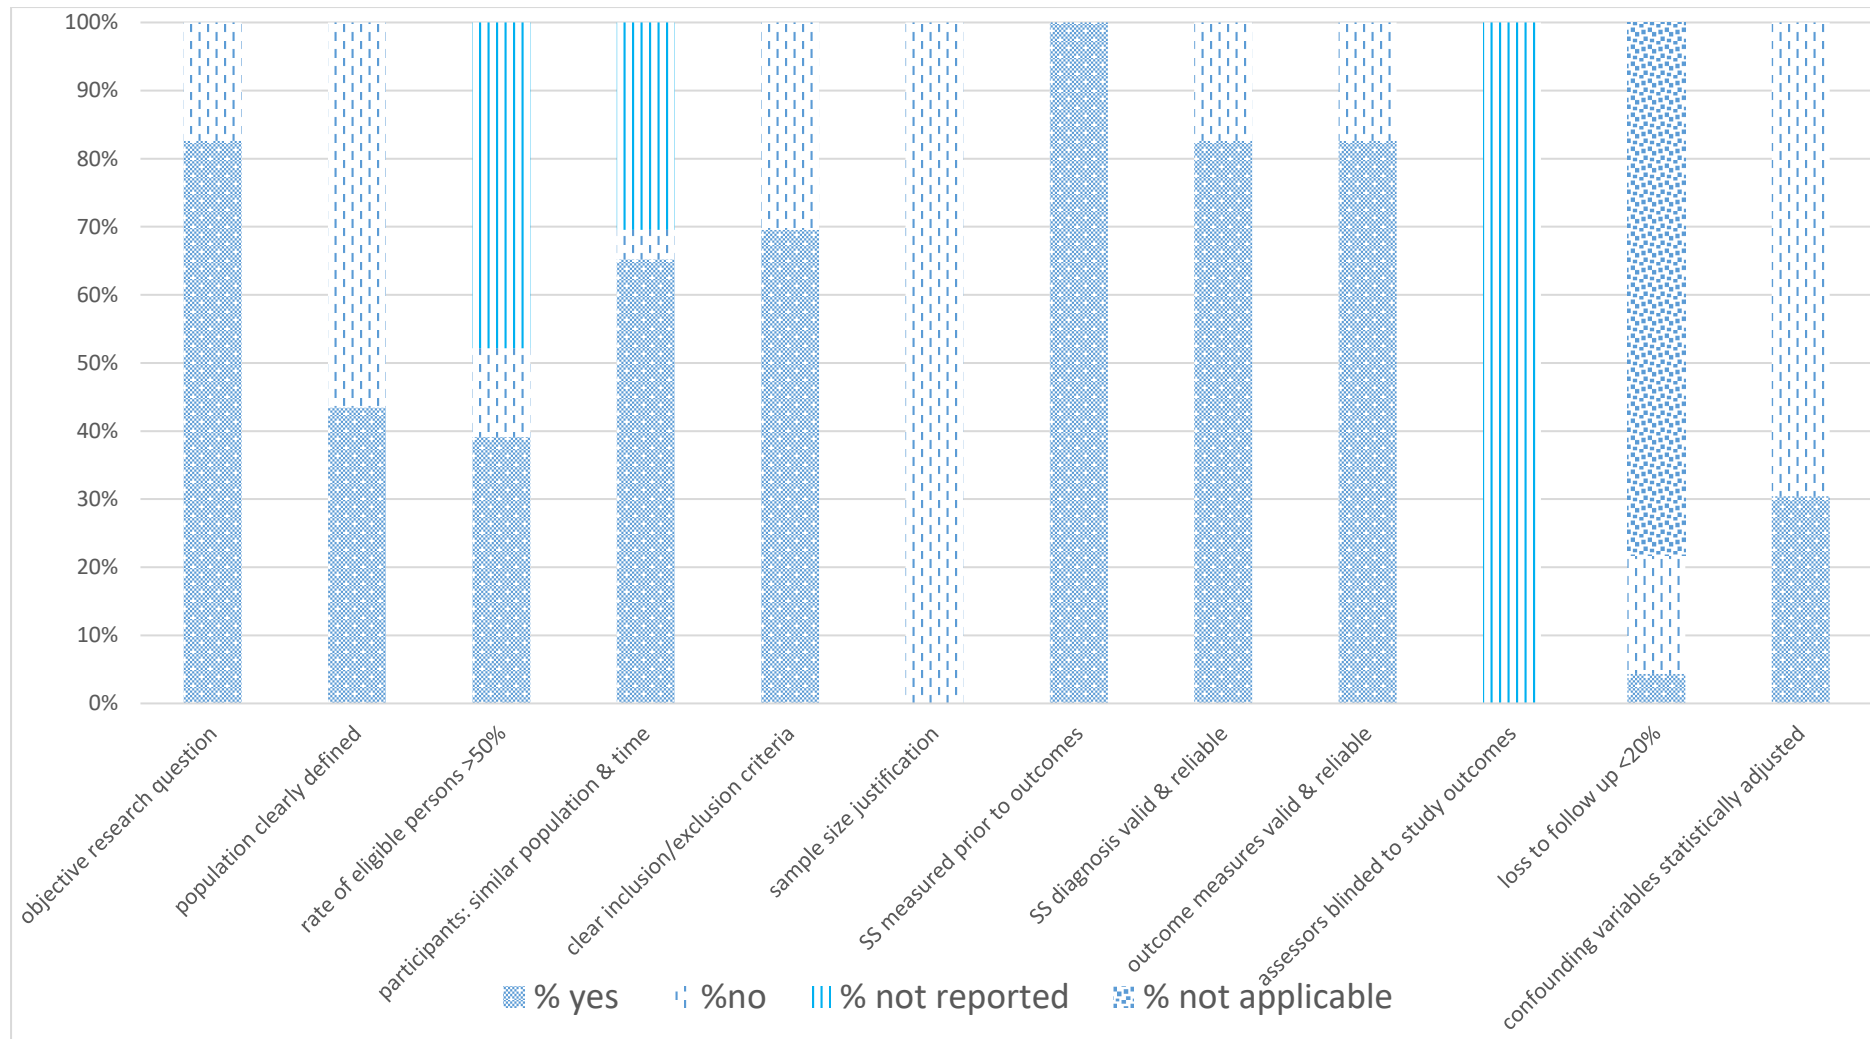

**eFigure 1**

Percentage of Observational Cross-Sectional and Cohort Studies Meeting Each of the Adapted NIH Study Quality Criteria ( $N_{\text{studies}} = 23$ ).  
 SS = sagittal synostosis

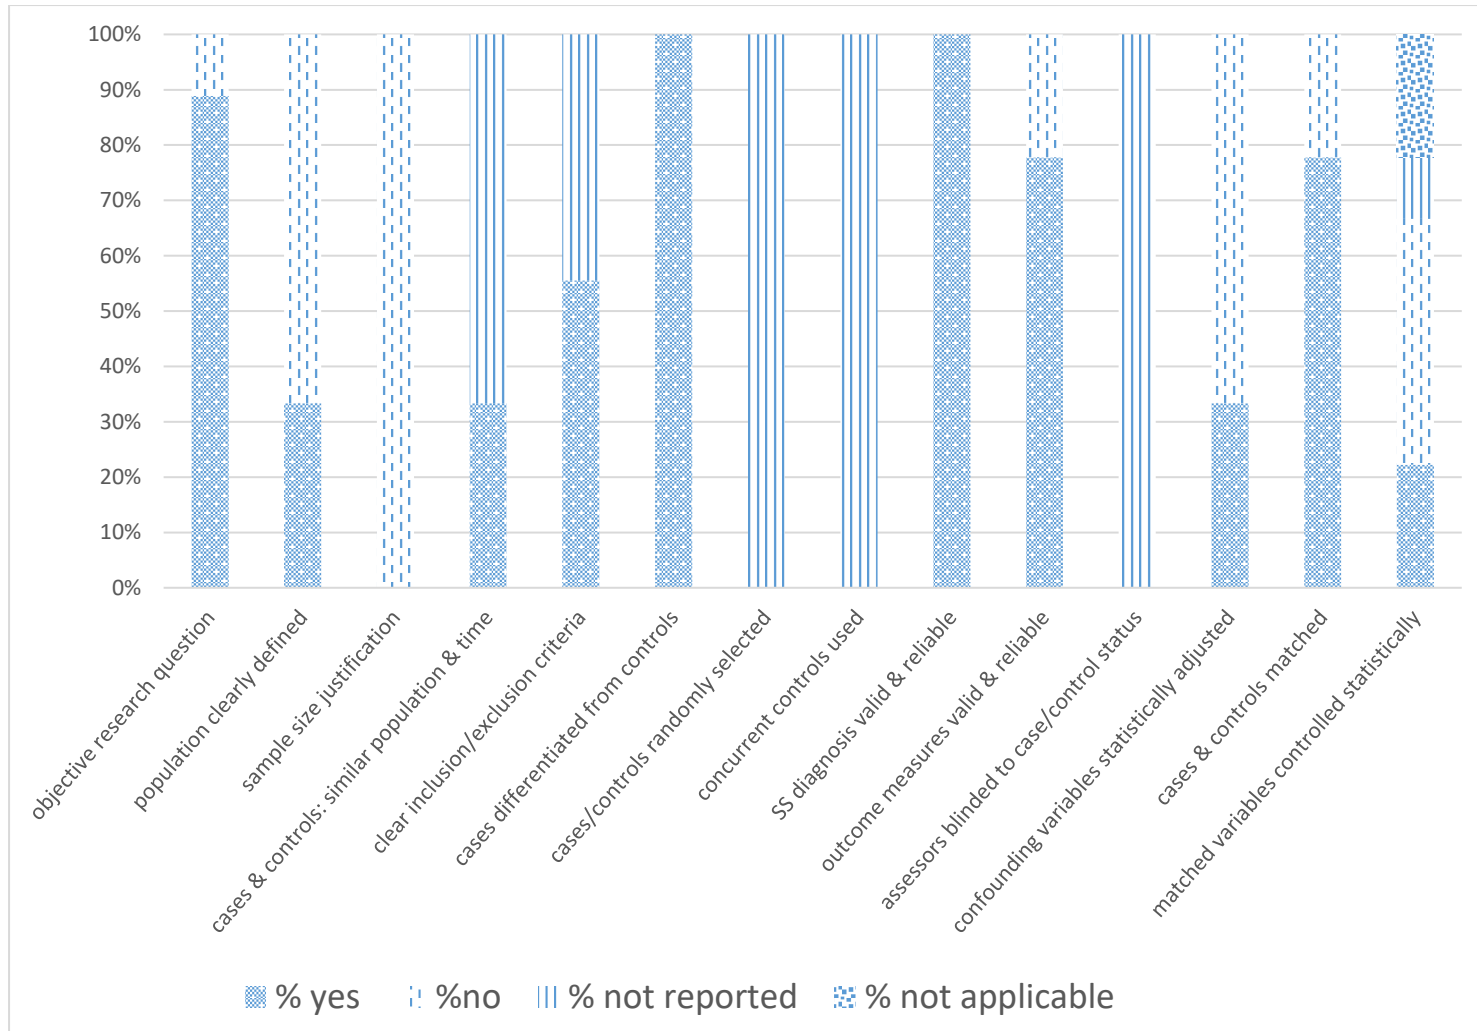

**eFigure 2**

Percentage of Case-Control Studies Meeting Each of the Adapted NIH Study Quality Criteria ( $N_{\text{studies}} = 9$ ). SS = sagittal synostosis.

CONSERVATIVELY MANAGED SAGITTAL SYNOSTOSIS

| Study details                        |           | Standardized Mean Group Differences |     |                        |            |                      | Prevalence Rates |     |     |     |                                              |    |    |    |     |                                                            |     |                   |    |     |
|--------------------------------------|-----------|-------------------------------------|-----|------------------------|------------|----------------------|------------------|-----|-----|-----|----------------------------------------------|----|----|----|-----|------------------------------------------------------------|-----|-------------------|----|-----|
| Authors                              | N         | Comparisons with healthy peers      |     | Comparisons with norms |            | Hedges' g and 95% CI |                  |     |     |     | Prevalence and 95% CI (single group studies) |    |    |    |     | Odds ratio and 95% CI (2 group studies; logarithmic scale) |     |                   |    |     |
| Objective measures                   |           | g                                   | p   | g                      | p          | -2.0                 | -1.0             | 0.0 | 1.0 | 2.0 | 0                                            | 25 | 50 | 75 | 100 | 0.01                                                       | 0.1 | 1                 | 10 | 100 |
|                                      |           |                                     |     |                        |            | SS outcomes worse    |                  |     |     |     | → increasing prevalence                      |    |    |    |     | SS outcomes better                                         |     | SS outcomes worse |    |     |
| <b>General cognition</b>             |           |                                     |     |                        |            |                      |                  |     |     |     |                                              |    |    |    |     |                                                            |     |                   |    |     |
| Arnaud, <sup>1</sup> 1995            | 51        |                                     |     |                        |            |                      |                  |     |     |     | 4%                                           |    |    |    |     |                                                            |     |                   |    |     |
| Boltshauser et al, <sup>6</sup> 2003 | 30        | -0.08                               | .79 |                        |            |                      |                  |     |     |     | 7%                                           |    |    |    |     |                                                            |     |                   |    |     |
| Bellew et al, (2005-2019)*           | 13        |                                     |     | .13                    | .64        |                      |                  |     |     |     |                                              |    |    |    |     |                                                            |     |                   |    |     |
| Kapp-Simon 1993/1998*                | 4         |                                     |     | .40                    | .42        |                      |                  |     |     |     |                                              |    |    |    |     |                                                            |     |                   |    |     |
| <b>OVERALL</b>                       | <b>98</b> |                                     |     | <b>.19</b>             | <b>.43</b> |                      |                  |     |     |     | <b>5%</b>                                    |    |    |    |     |                                                            |     |                   |    |     |
| <b>Motor functioning</b>             |           |                                     |     |                        |            |                      |                  |     |     |     |                                              |    |    |    |     |                                                            |     |                   |    |     |
| Bellew et al, (2005-2019)*           | 13        |                                     |     | -.15                   | .59        |                      |                  |     |     |     |                                              |    |    |    |     |                                                            |     |                   |    |     |
| <b>Verbal abilities/ language</b>    |           |                                     |     |                        |            |                      |                  |     |     |     |                                              |    |    |    |     |                                                            |     |                   |    |     |
| Bellew et al, (2005-2019)*           | 14        |                                     |     | .09                    | .74        |                      |                  |     |     |     |                                              |    |    |    |     |                                                            |     |                   |    |     |
| Boltshauser et al, <sup>6</sup> 2003 | 14        |                                     |     |                        |            |                      |                  |     |     |     | 7%                                           |    |    |    |     | 0.33                                                       |     |                   |    |     |
| <b>Visuospatial abilities</b>        |           |                                     |     |                        |            |                      |                  |     |     |     |                                              |    |    |    |     |                                                            |     |                   |    |     |
| Bellew et al, (2005-2019)*           | 14        |                                     |     | .02                    | .93        |                      |                  |     |     |     |                                              |    |    |    |     |                                                            |     |                   |    |     |
| Boltshauser et al, <sup>6</sup> 2003 |           |                                     |     |                        |            |                      |                  |     |     |     | 7%                                           |    |    |    |     | 0.69                                                       |     |                   |    |     |
| <b>Adaptive &amp; social skills</b>  |           |                                     |     |                        |            |                      |                  |     |     |     |                                              |    |    |    |     |                                                            |     |                   |    |     |
| Bellew et al, (2005-2019)*           | 13        |                                     |     | -.14                   | .62        |                      |                  |     |     |     |                                              |    |    |    |     |                                                            |     |                   |    |     |
| <b>Arithmetic</b>                    |           |                                     |     |                        |            |                      |                  |     |     |     |                                              |    |    |    |     |                                                            |     |                   |    |     |
| Boltshauser et al, <sup>6</sup> 2003 | 18        |                                     |     |                        |            |                      |                  |     |     |     |                                              |    |    |    |     | 0.71                                                       |     |                   |    |     |
| <b>Attention</b>                     |           |                                     |     |                        |            |                      |                  |     |     |     |                                              |    |    |    |     |                                                            |     |                   |    |     |
| Boltshauser et al, <sup>6</sup> 2003 | 19        |                                     |     |                        |            |                      |                  |     |     |     | 13%                                          |    |    |    |     | 1.04                                                       |     |                   |    |     |
| <b>Executive function</b>            |           |                                     |     |                        |            |                      |                  |     |     |     |                                              |    |    |    |     |                                                            |     |                   |    |     |
| Boltshauser et al, <sup>6</sup> 2003 | 12        |                                     |     |                        |            |                      |                  |     |     |     | 8%                                           |    |    |    |     |                                                            |     |                   |    |     |
| <b>Global development</b>            |           |                                     |     |                        |            |                      |                  |     |     |     |                                              |    |    |    |     |                                                            |     |                   |    |     |
| Bellew et al, (2005-2019)*           | 23        |                                     |     | .58                    | .01        |                      |                  |     |     |     |                                              |    |    |    |     |                                                            |     |                   |    |     |
| <b>Memory: shorter term</b>          |           |                                     |     |                        |            |                      |                  |     |     |     |                                              |    |    |    |     |                                                            |     |                   |    |     |
| Boltshauser et al, <sup>6</sup> 2003 | 18        |                                     |     |                        |            |                      |                  |     |     |     | 9%                                           |    |    |    |     | 0.70                                                       |     |                   |    |     |
| <b>Processing speed</b>              |           |                                     |     |                        |            |                      |                  |     |     |     |                                              |    |    |    |     |                                                            |     |                   |    |     |
| Boltshauser et al, <sup>6</sup> 2003 | 14        |                                     |     |                        |            |                      |                  |     |     |     | 7%                                           |    |    |    |     | 0.31                                                       |     |                   |    |     |

| <i>Subjective measures</i>           |    |       |     |                                                                                     |  |  |  |
|--------------------------------------|----|-------|-----|-------------------------------------------------------------------------------------|--|--|--|
| <b>Behavior- externalizing</b>       |    |       |     |                                                                                     |  |  |  |
| Boltshauser et al, <sup>6</sup> 2003 | 24 | -0.25 | .22 |  |  |  |  |
| <b>Behavior: internalizing</b>       |    |       |     |                                                                                     |  |  |  |
| Boltshauser et al, <sup>6</sup> 2003 | 24 | -0.30 | .14 |  |  |  |  |
| <b>Behavior: overall</b>             |    |       |     |                                                                                     |  |  |  |
| Boltshauser et al, <sup>6</sup> 2003 | 24 | -0.29 | .16 |  |  |  |  |
| <b>Quality of life</b>               |    |       |     |                                                                                     |  |  |  |
| Boltshauser et al, <sup>6</sup> 2003 | 24 | .00   | 1.0 |  |  |  |  |

Note: *N* refers to sagittal synostosis participants; \* = details for studies comprising the same participants across multiple papers are provided in eTable 2 in the Supplement; green forest plots = comparisons between SS and healthy norms; black forest plots = comparisons between SS and normative data.

### eFigure 3

*Outcomes of Children With Conservatively Managed Sagittal Synostosis.*

PRE-SURGICAL SAGITTAL SYNOSTOSIS

| Study details                         |            | Standardized Mean Group Differences |            |                        |            |                      |      | Prevalence Rates      |     |     |            |                         |    |    |
|---------------------------------------|------------|-------------------------------------|------------|------------------------|------------|----------------------|------|-----------------------|-----|-----|------------|-------------------------|----|----|
| Authors                               | N          | Comparisons with healthy peers      |            | Comparisons with norms |            | Hedges' g and 95% CI |      | Prevalence and 95% CI |     |     |            |                         |    |    |
| Objective measures                    |            | g                                   | p          | g                      | p          | -2.0                 | -1.0 | 0.0                   | 1.0 | 2.0 | 0          | 25                      | 50 | 75 |
|                                       |            |                                     |            |                        |            | SS outcomes worse    |      | SS outcomes better    |     |     |            | → increasing prevalence |    |    |
| <b>General cognition</b>              |            |                                     |            |                        |            |                      |      |                       |     |     |            |                         |    |    |
| Chuang et al, <sup>13</sup> 2018      | 9          | .31                                 | .45        |                        |            |                      |      |                       |     |     |            |                         |    |    |
| Da Costa et al, 2012/2013*            | 26         |                                     |            | -.24                   | .22        |                      |      |                       |     |     |            |                         |    |    |
| ILP (2005 – 2017)*                    | 62         | -.46                                | .00        |                        |            |                      |      |                       |     |     |            |                         |    |    |
| Imahiyerobo et al, <sup>22</sup> 2019 | 77         |                                     |            | .52                    | .00        |                      |      |                       |     |     |            |                         |    |    |
| Kapp-Simon 1993/1998*                 | 20         |                                     |            | .17                    | .46        |                      |      |                       |     |     |            |                         |    |    |
| Lee et al, 2015/2017*                 | 37         |                                     |            | -1.03                  | .00        |                      |      |                       |     |     | 37%        |                         |    |    |
| Speltz et al, <sup>51</sup> 1997      | 18         | .29                                 | .37        |                        |            |                      |      |                       |     |     |            |                         |    |    |
| <b>OVERALL</b>                        | <b>249</b> | <b>-.28</b>                         | <b>.15</b> | <b>-.15</b>            | <b>.70</b> |                      |      |                       |     |     |            |                         |    |    |
| <b>Motor functioning</b>              |            |                                     |            |                        |            |                      |      |                       |     |     |            |                         |    |    |
| Bellew et al, (2005-2019)*            | 28         | -.44                                | .10        |                        |            |                      |      |                       |     |     |            |                         |    |    |
| Chieffo et al, <sup>12</sup> 2020     | 87         |                                     |            |                        |            |                      |      |                       |     |     | 11%        |                         |    |    |
| Da Costa et al, 2012/2013*            | 26         |                                     |            | -.82                   | .00        |                      |      |                       |     |     |            |                         |    |    |
| Gewalli et al, <sup>19</sup> 2001     | 26         |                                     |            | .44                    | .03        |                      |      |                       |     |     |            |                         |    |    |
| ILP (2005 – 2017)*                    | 62         | -.41                                | .01        |                        |            |                      |      |                       |     |     |            |                         |    |    |
| Imahiyerobo et al, <sup>22</sup> 2019 | 77         |                                     |            | .21                    | .07        |                      |      |                       |     |     |            |                         |    |    |
| Lee et al, 2015/2017*                 | 37         |                                     |            | -1.04                  | .00        |                      |      |                       |     |     | 26%        |                         |    |    |
| Speltz et al, <sup>51</sup> 1997      | 18         | -.47                                | .15        |                        |            |                      |      |                       |     |     |            |                         |    |    |
| <b>OVERALL</b>                        | <b>361</b> | <b>-.42</b>                         | <b>.00</b> | <b>-.30</b>            | <b>.41</b> |                      |      |                       |     |     | <b>17%</b> |                         |    |    |
| <b>Verbal abilities / language</b>    |            |                                     |            |                        |            |                      |      |                       |     |     |            |                         |    |    |
| Bellew et al, (2005-2019)*            | 28         | -.01                                | .96        |                        |            |                      |      |                       |     |     |            |                         |    |    |
| Chieffo et al, <sup>12</sup> 2020     | 87         |                                     |            |                        |            |                      |      |                       |     |     | 8%         |                         |    |    |
| Chuang et al, <sup>13</sup> 2018      | 9          | .32                                 | .45        |                        |            |                      |      |                       |     |     |            |                         |    |    |
| Gewalli et al, <sup>19</sup> 2001     | 26         |                                     |            | .24                    | .23        |                      |      |                       |     |     |            |                         |    |    |
| ILP (2005 – 2017)*                    | 62         | -.03                                | .85        |                        |            |                      |      |                       |     |     |            |                         |    |    |
| Imahiyerobo et al, <sup>22</sup> 2019 | 77         |                                     |            | .15                    | .22        |                      |      |                       |     |     |            |                         |    |    |
| Scheuerle 2004                        | 3          |                                     |            |                        |            |                      |      |                       |     |     | 33%        |                         |    |    |
| <b>OVERALL</b>                        | <b>292</b> | <b>.01</b>                          | <b>.96</b> | <b>.17</b>             | <b>.09</b> |                      |      |                       |     |     | <b>13%</b> |                         |    |    |
| <b>Visuospatial abilities</b>         |            |                                     |            |                        |            |                      |      |                       |     |     |            |                         |    |    |
| Bellew et al, (2005-2019)*            | 28         | -.09                                | .73        |                        |            |                      |      |                       |     |     |            |                         |    |    |
| Chieffo et al, <sup>12</sup> 2020     | 87         |                                     |            |                        |            |                      |      |                       |     |     | 7%         |                         |    |    |
| Gewalli et al, <sup>19</sup> 2001     | 26         |                                     |            | .44                    | .03        |                      |      |                       |     |     |            |                         |    |    |
| <b>OVERALL</b>                        | <b>141</b> |                                     |            |                        |            |                      |      |                       |     |     |            |                         |    |    |
| <b>Adaptive &amp; social skills</b>   |            |                                     |            |                        |            |                      |      |                       |     |     |            |                         |    |    |
| Bellew et al, (2005-2019)*            | 28         | -.21                                | .44        |                        |            |                      |      |                       |     |     |            |                         |    |    |
| Chieffo et al, <sup>12</sup> 2020     | 87         |                                     |            |                        |            |                      |      |                       |     |     | 6%         |                         |    |    |
| Gewalli et al, <sup>19</sup> 2001     | 26         |                                     |            | .21                    | .30        |                      |      |                       |     |     |            |                         |    |    |
| <b>OVERALL</b>                        | <b>141</b> |                                     |            |                        |            |                      |      |                       |     |     |            |                         |    |    |
| <b>Global development</b>             |            |                                     |            |                        |            |                      |      |                       |     |     |            |                         |    |    |
| Arnaud, <sup>1</sup> 1995             | 142        |                                     |            |                        |            |                      |      |                       |     |     | 8%         |                         |    |    |
| Bellew et al, (2005-2019)*            | 28         | -.31                                | .25        |                        |            |                      |      |                       |     |     |            |                         |    |    |
| Chieffo et al, <sup>12</sup> 2020     | 87         |                                     |            |                        |            |                      |      |                       |     |     | 25%        |                         |    |    |
| Engel et al, <sup>18</sup> 2012       | 46         |                                     |            |                        |            |                      |      |                       |     |     | 17%        |                         |    |    |
| Gewalli et al, <sup>19</sup> 2001     | 26         |                                     |            | .30                    | .13        |                      |      |                       |     |     | 8%         |                         |    |    |
| Imahiyerobo et al, <sup>22</sup> 2019 | 77         |                                     |            |                        |            |                      |      |                       |     |     | 18%        |                         |    |    |

Note: *N* refers to sagittal synostosis participants; ILP = Infant Learning Project combined papers; \* = details for studies comprising the same participants across multiple papers are provided in eTable 2 in the Supplement; green forest plots = comparisons between SS and healthy norms; black forest plots = comparisons between SS and normative data.

**eFigure 4**

*Presurgical Functioning of Children With Sagittal Synostosis: Had Not Yet Undergone Surgery Prior to Being Assessed.*

POST-SURGICAL SAGITTAL SYNOSTOSIS

| Study details                               |            | Standardized Mean Group Differences |            |                        |            |                      | Prevalence Rates |     |     |     |                                              |    |                                                            |    |      |     |   |    |     |
|---------------------------------------------|------------|-------------------------------------|------------|------------------------|------------|----------------------|------------------|-----|-----|-----|----------------------------------------------|----|------------------------------------------------------------|----|------|-----|---|----|-----|
| Authors                                     | N          | Comparisons with healthy peers      |            | Comparisons with norms |            | Hedges' g and 95% CI |                  |     |     |     | Prevalence and 95% CI (single group studies) |    | Odds ratio and 95% CI (2 group studies; logarithmic scale) |    |      |     |   |    |     |
| Objective measures                          |            | g                                   | p          | g                      | p          | -2.0                 | -1.0             | 0.0 | 1.0 | 2.0 | 0                                            | 25 | 50                                                         | 75 | 0.01 | 0.1 | 1 | 10 | 100 |
| <b>General cognition</b>                    |            |                                     |            |                        |            |                      |                  |     |     |     |                                              |    |                                                            |    |      |     |   |    |     |
| Arnaud, <sup>1</sup> 1995                   | 47         |                                     |            |                        |            |                      |                  |     |     |     | 11%                                          |    |                                                            |    |      |     |   |    |     |
| Bellew et al, (2005-2019)*                  | 54         |                                     |            | .10                    | .59        |                      |                  |     |     |     | 28%                                          |    |                                                            |    |      |     |   |    |     |
| Chuang et al, <sup>14</sup> 2021            | 47         |                                     |            | .43                    | .00        |                      |                  |     |     |     |                                              |    |                                                            |    |      |     |   |    |     |
| Da Costa et al, <sup>15</sup> 2006          | 6          |                                     |            | -.03                   | .94        |                      |                  |     |     |     |                                              |    |                                                            |    |      |     |   |    |     |
| Da Costa et al, 2012/2013*                  | 26         |                                     |            | -.42                   | .10        |                      |                  |     |     |     |                                              |    |                                                            |    |      |     |   |    |     |
| Hashim/Patel et al, 2014*                   | 70         |                                     |            | .52                    | .00        |                      |                  |     |     |     |                                              |    |                                                            |    |      |     |   |    |     |
| ILP (2005 – 2017)*                          | 94         | -.28                                | .04        |                        |            |                      |                  |     |     |     |                                              |    |                                                            |    |      |     |   |    |     |
| Kapp-Simon et al, 1993/1998*                | 20         |                                     |            | -.13                   | .63        |                      |                  |     |     |     |                                              |    |                                                            |    |      |     |   |    |     |
| Kljajic et al, 2019/2020*                   | 41         |                                     |            | -.25                   | .11        |                      |                  |     |     |     |                                              |    |                                                            |    |      |     |   |    |     |
| Lee et al, 2015/2017*                       | 25         |                                     |            | -.38                   | .06        |                      |                  |     |     |     | 22%                                          |    |                                                            |    |      |     |   |    |     |
| Moreno-Villagomez et al, <sup>45</sup> 2020 | 10         |                                     |            | .01                    | .98        |                      |                  |     |     |     |                                              |    |                                                            |    |      |     |   |    |     |
| Speltz et al, <sup>51</sup> 1997            | 19         | .21                                 | .51        |                        |            |                      |                  |     |     |     | 20%                                          |    |                                                            |    |      |     |   |    |     |
| <b>OVERALL</b>                              | <b>459</b> | <b>-.12</b>                         | <b>.60</b> | <b>.01</b>             | <b>.96</b> |                      |                  |     |     |     |                                              |    |                                                            |    |      |     |   |    |     |
| <b>Motor functioning</b>                    |            |                                     |            |                        |            |                      |                  |     |     |     |                                              |    |                                                            |    |      |     |   |    |     |
| Bellew et al, (2005-2019)*                  | 50         |                                     |            | .58                    | .00        |                      |                  |     |     |     |                                              |    |                                                            |    |      |     |   |    |     |
| Chieffo et al, <sup>12</sup> 2020           | 63         |                                     |            |                        |            |                      |                  |     |     |     | 6%                                           |    |                                                            |    |      |     |   |    |     |
| Chuang et al, <sup>14</sup> 2021            | 47         |                                     |            | .27                    | .07        |                      |                  |     |     |     |                                              |    |                                                            |    |      |     |   |    |     |
| Da Costa et al, 2012/2013*                  | 16         |                                     |            | -.89                   | .00        |                      |                  |     |     |     |                                              |    |                                                            |    |      |     |   |    |     |
| Gewalli et al, <sup>19</sup> 2001           | 26         |                                     |            | .16                    | .42        |                      |                  |     |     |     |                                              |    |                                                            |    |      |     |   |    |     |
| Hashim/Patel et al, 2014*                   | 70         |                                     |            | .27                    | .03        |                      |                  |     |     |     |                                              |    |                                                            |    |      |     |   |    |     |
| ILP (2005 – 2017)*                          | 94         | -.22                                | .12        |                        |            |                      |                  |     |     |     |                                              |    |                                                            |    |      |     |   |    |     |
| Lee 2015/2017                               | 25         |                                     |            | -.41                   | .04        |                      |                  |     |     |     | 22%                                          |    |                                                            |    |      |     |   |    |     |
| Moreno-Villagomez et al, <sup>45</sup> 2020 | 10         |                                     |            | -.14                   | .66        |                      |                  |     |     |     |                                              |    |                                                            |    |      |     |   |    |     |
| Speltz et al, <sup>51</sup> 1997            | 19         | .00                                 | 1.0        |                        |            |                      |                  |     |     |     |                                              |    |                                                            |    |      |     |   |    |     |
| Virtanen et al, <sup>52</sup> 1999          | 18         | -.15                                | .65        |                        |            |                      |                  |     |     |     |                                              |    |                                                            |    |      |     |   |    |     |
| <b>OVERALL</b>                              | <b>438</b> | <b>-.18</b>                         | <b>.13</b> | <b>.01</b>             | <b>.93</b> |                      |                  |     |     |     |                                              |    |                                                            |    |      |     |   |    |     |
| <b>Verbal abilities / language</b>          |            |                                     |            |                        |            |                      |                  |     |     |     |                                              |    |                                                            |    |      |     |   |    |     |

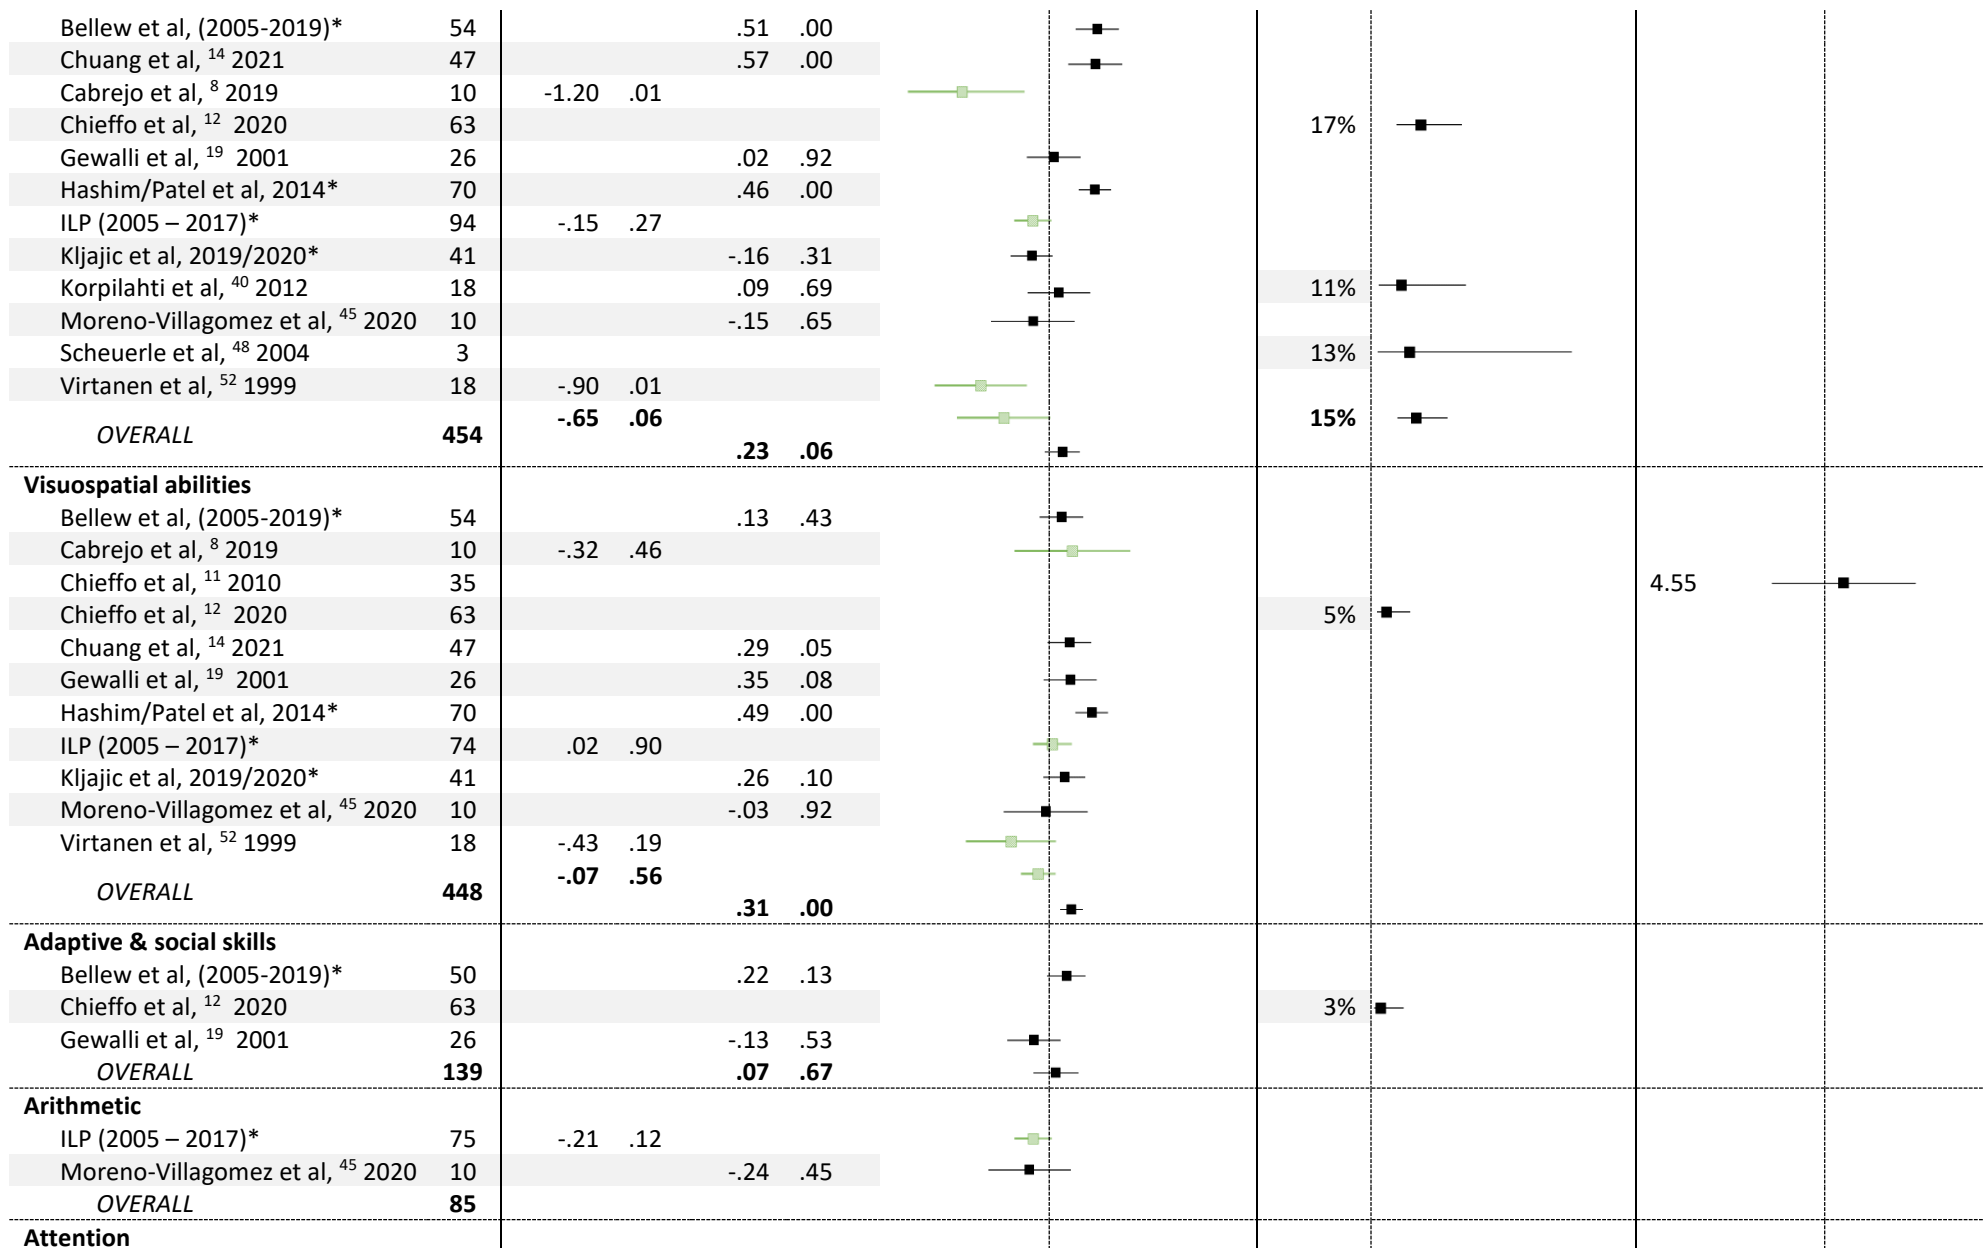



|                                             |            |              |            |              |            |            |      |  |
|---------------------------------------------|------------|--------------|------------|--------------|------------|------------|------|--|
| ILP (2005 – 2017)*                          | 76         | -0.11        | .43        |              |            |            |      |  |
| Kljajic et al, 2019/2020*                   | 38         |              |            | -0.51        | .00        |            |      |  |
| Virtanen et al, <sup>52</sup> 1999          | 18         | -0.82        | .02        |              |            |            |      |  |
| <b>OVERALL</b>                              | <b>132</b> | <b>-0.40</b> | <b>.26</b> |              |            |            |      |  |
| <b>Executive function</b>                   |            |              |            |              |            |            |      |  |
| ILP (2005 – 2017)*                          | 75         | -0.18        | .19        |              |            |            |      |  |
| <b>Global development</b>                   |            |              |            |              |            |            |      |  |
| Bellew et al, (2005-2019)*                  | 50         |              |            | .53          | .00        |            |      |  |
| Gewalli et al, <sup>19</sup> 2001           | 26         |              |            | .09          | .64        | 15%        |      |  |
| <b>OVERALL</b>                              | <b>76</b>  |              |            | <b>.34</b>   | <b>.13</b> |            |      |  |
| <b>Learning difficulties</b>                |            |              |            |              |            |            |      |  |
| Chuang et al, <sup>14</sup> 2021            | 47         |              |            |              |            | 12%        |      |  |
| ILP (2005 – 2017)*                          | 70         |              |            |              |            |            | 0.64 |  |
| Hashim/Patel et al, 2014*                   | 70         |              |            |              |            | 23%        |      |  |
| Kapp-Simon et al, 1993/1998*                | 10         |              |            |              |            | 13%        |      |  |
| Magge et al, <sup>43</sup> 2002             | 16         |              |            |              |            | 50%        |      |  |
| <b>OVERALL</b>                              | <b>213</b> |              |            |              |            | <b>22%</b> |      |  |
| <b>Memory: shorter term</b>                 |            |              |            |              |            |            |      |  |
| ILP (2005 – 2017)*                          | 74         | -0.24        | .09        |              |            |            |      |  |
| Kljajic et al, 2019/2020*                   | 41         |              |            | -0.49        | .00        |            |      |  |
| Moreno-Villagomez et al, <sup>45</sup> 2020 | 10         |              |            | -0.28        | .38        |            |      |  |
| Virtanen et al, <sup>52</sup> 1999          | 18         | .00          | 1.0        |              |            |            |      |  |
| <b>OVERALL</b>                              | <b>143</b> | <b>-0.20</b> | <b>.12</b> |              |            |            |      |  |
|                                             |            |              |            | <b>-0.45</b> | <b>.00</b> |            |      |  |
| <b>Memory: longer term</b>                  |            |              |            |              |            |            |      |  |
| ILP (2005 – 2017)*                          | 74         | -0.18        | .20        |              |            |            |      |  |
| <b>Processing speed</b>                     |            |              |            |              |            |            |      |  |
| Kljajic et al, 2019/2020*                   | 41         |              |            | -0.65        | .00        |            |      |  |
| Moreno-Villagomez et al, <sup>45</sup> 2020 | 7          |              |            | .27          | .48        |            |      |  |
| <b>OVERALL</b>                              | <b>48</b>  |              |            | <b>-0.26</b> | <b>.57</b> |            |      |  |
| <i>Subjective measures</i>                  |            |              |            |              |            |            |      |  |
| <b>Motor functioning</b>                    |            |              |            |              |            |            |      |  |
| Care et al, <sup>53</sup> 2019              | 138        |              |            |              |            | 10%        |      |  |
| <b>Verbal abilities / language</b>          |            |              |            |              |            |            |      |  |
| ILP (2005 – 2017)*                          | 70         | -0.01        | .93        |              |            |            |      |  |
| Care et al, <sup>53</sup> 2019              | 138        |              |            |              |            | 9%         |      |  |
| <b>OVERALL</b>                              | <b>208</b> |              |            |              |            |            |      |  |



|                                      |            |  |  |  |  |  |  |  |  |
|--------------------------------------|------------|--|--|--|--|--|--|--|--|
| Chuang et al, <sup>14</sup> 2021     | 47         |  |  |  |  |  |  |  |  |
| Hashim/Patel et al, 2014*            | 70         |  |  |  |  |  |  |  |  |
| <b>OVERALL</b>                       | <b>192</b> |  |  |  |  |  |  |  |  |
| <b>Quality of life</b>               |            |  |  |  |  |  |  |  |  |
| Mazzaferro et al, <sup>44</sup> 2018 | 5          |  |  |  |  |  |  |  |  |
| <b>Satisfaction with appearance</b>  |            |  |  |  |  |  |  |  |  |
| Salokorpi et al, <sup>54</sup> 2018  | 40         |  |  |  |  |  |  |  |  |
| <b>Self-concept</b>                  |            |  |  |  |  |  |  |  |  |
| Speltz et al, <sup>50</sup> 1993     | 7          |  |  |  |  |  |  |  |  |

Note: *N* refers to sagittal synostosis participants; ILP = Infant Learning Project combined papers; \* = details for studies comprising the same participants across multiple papers are provided in eTable 2 in the Supplement; green forest plots = comparisons between SS and healthy norms; black forest plots = comparisons between SS and normative data.

#### eFigure 5

*Outcomes of Children With Operated Sagittal Synostosis: Had Undergone Surgery Prior to Being Assessed.*

**eFigure 6**

*Pooled Analyses for Each Cognitive, Behavioral and Psychological Domain, Partitioned According to Surgical Status (Conservatively Managed, Presurgical, Postsurgical) and Age at Assessment: A (0 – 0.11); B (1:0 – 2:11); C (3:0 – 6:11); D (7:0 – 17:11); E (>18:0)*

**OBJECTIVE MEASURES**

**3a. General cognition: conservatively managed samples**

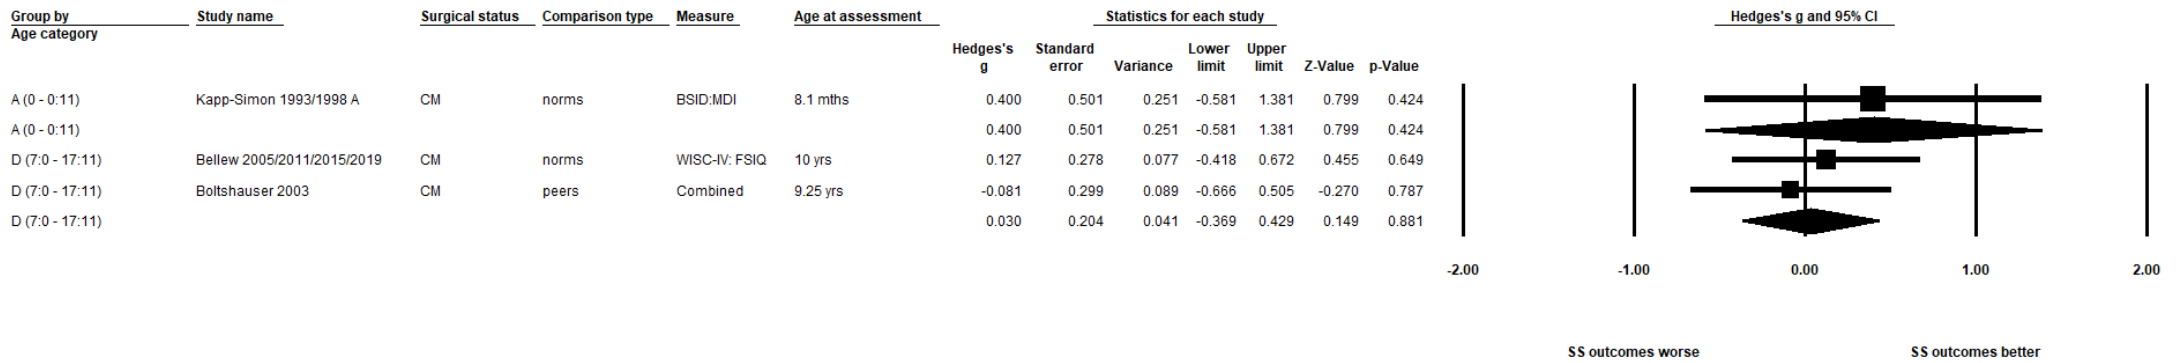

**3b. General cognition: pre-surgical samples**

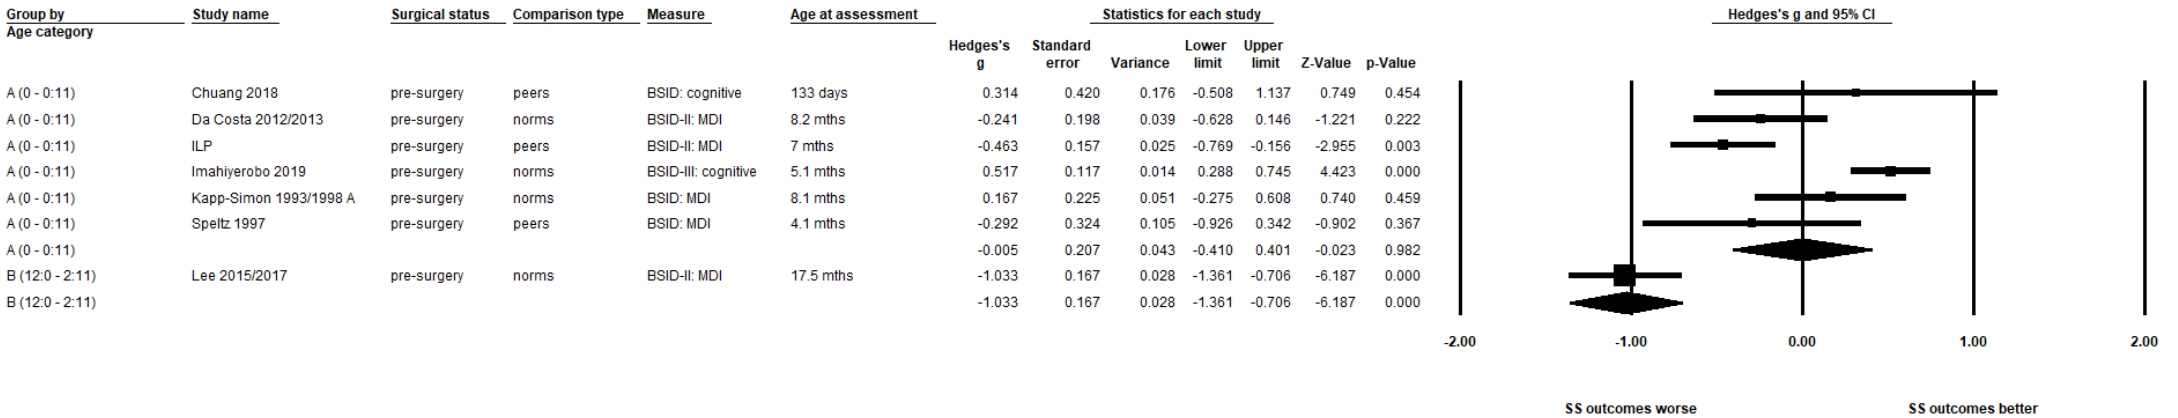

### 3c. General cognition: post-surgical samples

| Group by<br>Age category | Study name                 | Surgical status | Comparison type | Measure         | Age at assessment | Statistics for each study |                |          |             |             |         |         |
|--------------------------|----------------------------|-----------------|-----------------|-----------------|-------------------|---------------------------|----------------|----------|-------------|-------------|---------|---------|
|                          |                            |                 |                 |                 |                   | Hedges's g                | Standard error | Variance | Lower limit | Upper limit | Z-Value | p-Value |
| B (12:0 - 2:11)          | Da Costa 2012/2013         | post-surgery    | norms           | BSID-II: MDI    | 21.2 mths         | -0.419                    | 0.251          | 0.063    | -0.911      | 0.073       | -1.668  | 0.095   |
| B (12:0 - 2:11)          | ILP B                      | post-surgery    | peers           | BSID-II: MDI    | 18 mths           | -0.180                    | 0.132          | 0.017    | -0.438      | 0.078       | -1.366  | 0.172   |
| B (12:0 - 2:11)          | Kapp-Simon 1993/1998 B     | post-surgery    | norms           | BSID: MDI       | 21 mths           | -0.167                    | 0.237          | 0.056    | -0.632      | 0.298       | -0.704  | 0.481   |
| B (12:0 - 2:11)          | Lee 2015/2017              | post-surgery    | norms           | BSID-II: MDI    | 31.5 mth          | -0.383                    | 0.201          | 0.041    | -0.778      | 0.012       | -1.900  | 0.057   |
| B (12:0 - 2:11)          | Speltz 1997 A              | post-surgery    | peers           | BSID: MDI       | 12.4 mths         | 0.337                     | 0.320          | 0.102    | -0.290      | 0.965       | 1.054   | 0.292   |
| B (12:0 - 2:11)          | Speltz 1997 B              | post-surgery    | peers           | BSID: MDI       | 24.4 mths         | 0.085                     | 0.322          | 0.104    | -0.546      | 0.716       | 0.263   | 0.793   |
| B (12:0 - 2:11)          |                            |                 |                 |                 |                   | -0.186                    | 0.089          | 0.008    | -0.360      | -0.012      | -2.092  | 0.036   |
| C (3:0 - 6:11)           | ILP C                      | post-surgery    | peers           | BSID-II: MDI    | 3 yrs             | -0.356                    | 0.125          | 0.016    | -0.601      | -0.111      | -2.851  | 0.004   |
| C (3:0 - 6:11)           | Kapp-Simon 1993/1998 C     | post-surgery    | norms           | BSID: MDI       | 50 mths           | -0.089                    | 0.290          | 0.084    | -0.657      | 0.480       | -0.305  | 0.760   |
| C (3:0 - 6:11)           | Moreno-Villagomez 2020     | post-surgery    | norms           | WPPSI-III: FSIQ | 54.2 mths         | 0.007                     | 0.317          | 0.100    | -0.615      | 0.628       | 0.021   | 0.983   |
| C (3:0 - 6:11)           |                            |                 |                 |                 |                   | -0.277                    | 0.108          | 0.012    | -0.489      | -0.066      | -2.568  | 0.010   |
| D (7:0 - 17:11)          | Bellew 2005/2011/2015/2019 | post-surgery    | norms           | WISC-IV: FSIQ   | Combined          | 0.095                     | 0.177          | 0.031    | -0.253      | 0.442       | 0.534   | 0.593   |
| D (7:0 - 17:11)          | Da Costa 2006              | post-surgery    | norms           | WISC-III: FSIQ  | 10.9 yrs          | -0.033                    | 0.409          | 0.167    | -0.834      | 0.768       | -0.082  | 0.935   |
| D (7:0 - 17:11)          | Hashim 2014/Patel 2014     | post-surgery    | norms           | WASI: FSIQ      | 10.04 yrs         | 0.521                     | 0.122          | 0.015    | 0.283       | 0.759       | 4.285   | 0.000   |
| D (7:0 - 17:11)          | ILP D                      | post-surgery    | peers           | WISC-IV: FSIQ   | 7 yrs             | -0.290                    | 0.137          | 0.019    | -0.558      | -0.022      | -2.122  | 0.034   |
| D (7:0 - 17:11)          | Kljajic 2019/2020          | post-surgery    | norms           | WISC-IV: FSIQ   | 11.5 yrs          | -0.254                    | 0.158          | 0.025    | -0.563      | 0.055       | -1.610  | 0.107   |
| D (7:0 - 17:11)          |                            |                 |                 |                 |                   | 0.016                     | 0.190          | 0.036    | -0.357      | 0.388       | 0.083   | 0.934   |

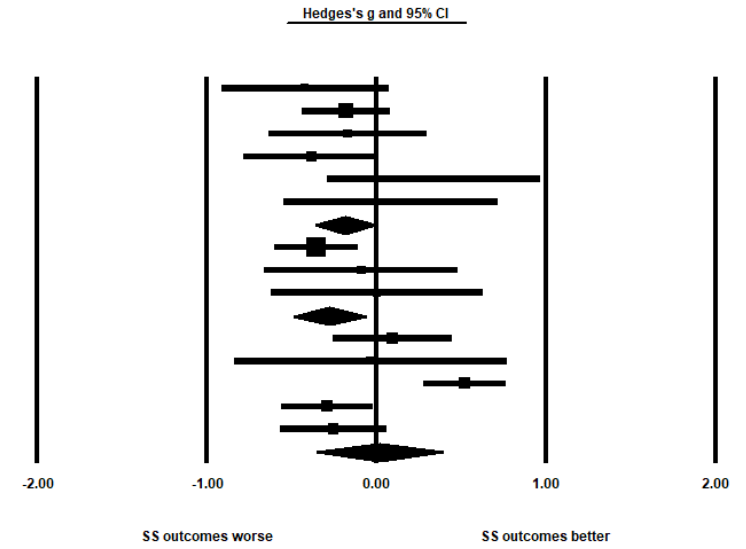

### 3d. Motor functioning: conservatively managed samples

| Group by<br>Age category | Study name                   | Surgical status | Comparison type | Measure  | Age at assessment | Statistics for each study |                |          |             |             |         |         |
|--------------------------|------------------------------|-----------------|-----------------|----------|-------------------|---------------------------|----------------|----------|-------------|-------------|---------|---------|
|                          |                              |                 |                 |          |                   | Hedges's g                | Standard error | Variance | Lower limit | Upper limit | Z-Value | p-Value |
| B (1:0 - 2:11)           | Bellew 2005/2011/2015/2019 B | CM              | norms           | Combined | Combined          | -0.152                    | 0.278          | 0.077    | -0.697      | 0.394       | -0.545  | 0.586   |
| B (1:0 - 2:11)           |                              |                 |                 |          |                   | -0.152                    | 0.278          | 0.077    | -0.697      | 0.394       | -0.545  | 0.586   |

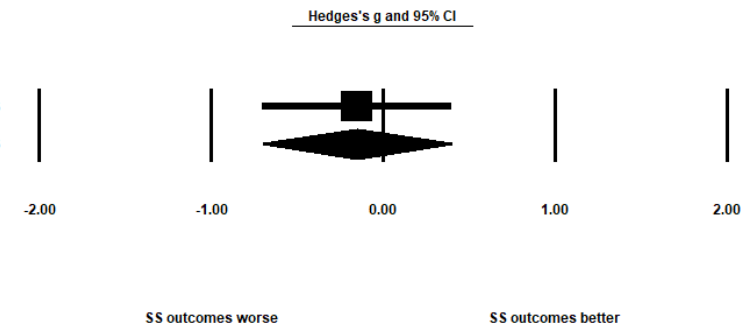

### 3e. Motor functioning: pre-surgical samples

| Group by<br>Age category | Study name                   | Surgical status | Comparison type | Measure     | Age at assessment | Statistics for each study |                |          |             |             |         |         |
|--------------------------|------------------------------|-----------------|-----------------|-------------|-------------------|---------------------------|----------------|----------|-------------|-------------|---------|---------|
|                          |                              |                 |                 |             |                   | Hedges's g                | Standard error | Variance | Lower limit | Upper limit | Z-Value | p-Value |
| A (0 - 0:11)             | Bellew 2005/2011/2015/2019 A | pre-surgery     | peers           | Combined    | 6.9 mths          | -0.436                    | 0.268          | 0.072    | -0.961      | 0.090       | -1.626  | 0.104   |
| A (0 - 0:11)             | Da Costa 2012/2013           | pre-surgery     | norms           | BSID-II PDI | 8.2 mths          | -0.822                    | 0.198          | 0.039    | -1.210      | -0.434      | -4.153  | 0.000   |
| A (0 - 0:11)             | Gewalli 2001                 | pre-surgery     | norms           | Combined    | 6.9 mths          | 0.442                     | 0.201          | 0.040    | 0.049       | 0.836       | 2.202   | 0.028   |
| A (0 - 0:11)             | ILP A                        | pre-surgery     | peers           | BSID-II PDI | 7 mths            | -0.409                    | 0.156          | 0.024    | -0.715      | -0.103      | -2.621  | 0.009   |
| A (0 - 0:11)             | Imahiyerobo 2019             | pre-surgery     | norms           | Combined    | 5.1 mths          | 0.211                     | 0.117          | 0.014    | -0.018      | 0.439       | 1.808   | 0.071   |
| A (0 - 0:11)             | Speltz 1997                  | pre-surgery     | peers           | BSID I PDI  | 4.1 mths          | -0.467                    | 0.326          | 0.107    | -1.107      | 0.173       | -1.431  | 0.153   |
| A (0 - 0:11)             |                              |                 |                 |             |                   | -0.228                    | 0.205          | 0.042    | -0.630      | 0.174       | -1.113  | 0.266   |
| B (1:0 - 2:11)           | Lee 2015/2017                | pre-surgery     | norms           | BSID-II PDI | 17.5 mths         | -1.037                    | 0.167          | 0.028    | -1.365      | -0.710      | -6.209  | 0.000   |
| B (1:0 - 2:11)           |                              |                 |                 |             |                   | -1.037                    | 0.167          | 0.028    | -1.365      | -0.710      | -6.209  | 0.000   |

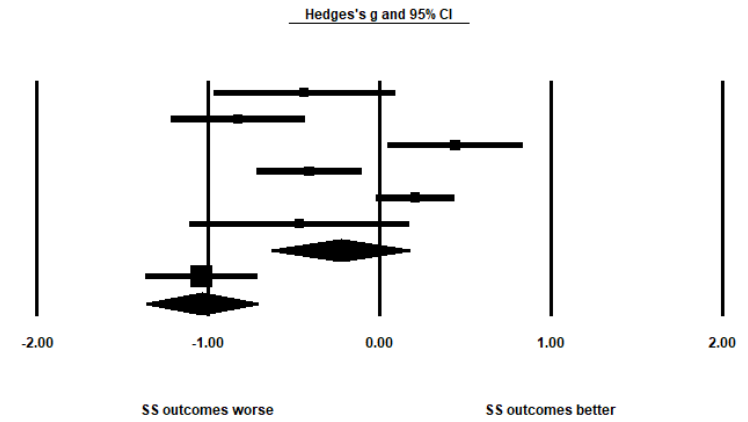

### 3f. Motor functioning: post-surgical samples

| Group by<br>Age category | Study name                   | Surgical status | Comparison type | Measure          | Age at assessment | Statistics for each study |                |          |             |             |         |         |
|--------------------------|------------------------------|-----------------|-----------------|------------------|-------------------|---------------------------|----------------|----------|-------------|-------------|---------|---------|
|                          |                              |                 |                 |                  |                   | Hedges's g                | Standard error | Variance | Lower limit | Upper limit | Z-Value | p-Value |
| B (1:0 - 2:11)           | Bellew 2005/2011/2015/2019 B | post-surgery    | norms           | Combined         | 15.2 mths         | 0.406                     | 0.148          | 0.022    | 0.117       | 0.696       | 2.750   | 0.006   |
| B (1:0 - 2:11)           | Da Costa 2012/2013           | post-surgery    | norms           | BSID-II PDI      | 21.2 mths         | -0.887                    | 0.252          | 0.063    | -1.380      | -0.394      | -3.528  | 0.000   |
| B (1:0 - 2:11)           | Gewalli 2001                 | post-surgery    | norms           | Combined         | 16.3 mths         | 0.162                     | 0.200          | 0.040    | -0.230      | 0.555       | 0.810   | 0.418   |
| B (1:0 - 2:11)           | ILP B                        | post-surgery    | peers           | BSID-II PDI      | 18 mths           | -0.225                    | 0.132          | 0.017    | -0.483      | 0.033       | -1.710  | 0.087   |
| B (1:0 - 2:11)           | Lee 2015/2017                | post-surgery    | norms           | BSID-II PDI      | 31.5 mths         | -0.405                    | 0.201          | 0.041    | -0.800      | -0.010      | -2.009  | 0.045   |
| B (1:0 - 2:11)           | Speltz 1997                  | post-surgery    | peers           | BSID I PDI       | Combined          | 0.000                     | 0.320          | 0.102    | -0.627      | 0.627       | 0.000   | 1.000   |
| B (1:0 - 2:11)           |                              |                 |                 |                  |                   | -0.143                    | 0.182          | 0.033    | -0.499      | 0.213       | -0.786  | 0.432   |
| C (3:0 - 6:11)           | Bellew 2005/2011/2015/2019 C | post-surgery    | norms           | Combined         | 5 yrs             | 0.744                     | 0.143          | 0.021    | 0.463       | 1.026       | 5.188   | 0.000   |
| C (3:0 - 6:11)           | ILP C                        | post-surgery    | peers           | BSID-II PDI      | 3 yrs             | -0.313                    | 0.124          | 0.015    | -0.556      | -0.071      | -2.534  | 0.011   |
| C (3:0 - 6:11)           | Moreno-Villagomez 2020       | post-surgery    | norms           | WPPSI-III: motor | 54.2 mths         | -0.139                    | 0.317          | 0.101    | -0.761      | 0.482       | -0.440  | 0.660   |
| C (3:0 - 6:11)           |                              |                 |                 |                  |                   | 0.108                     | 0.397          | 0.157    | -0.669      | 0.885       | 0.272   | 0.785   |
| D (7:0 - 17:11)          | Hashim 2014 / Patel 2014     | post-surgery    | norms           | Beery VMI        | 10.04 yrs         | 0.265                     | 0.124          | 0.015    | 0.022       | 0.507       | 2.141   | 0.032   |
| D (7:0 - 17:11)          | ILP D                        | post-surgery    | peers           | Combined         | 7 yrs             | -0.209                    | 0.140          | 0.020    | -0.484      | 0.066       | -1.488  | 0.137   |
| D (7:0 - 17:11)          | Virtanen 1999                | post-surgery    | peers           | Combined         | 146.8 mths        | -0.148                    | 0.327          | 0.107    | -0.789      | 0.492       | -0.454  | 0.650   |
| D (7:0 - 17:11)          |                              |                 |                 |                  |                   | -0.002                    | 0.185          | 0.034    | -0.365      | 0.361       | -0.010  | 0.992   |

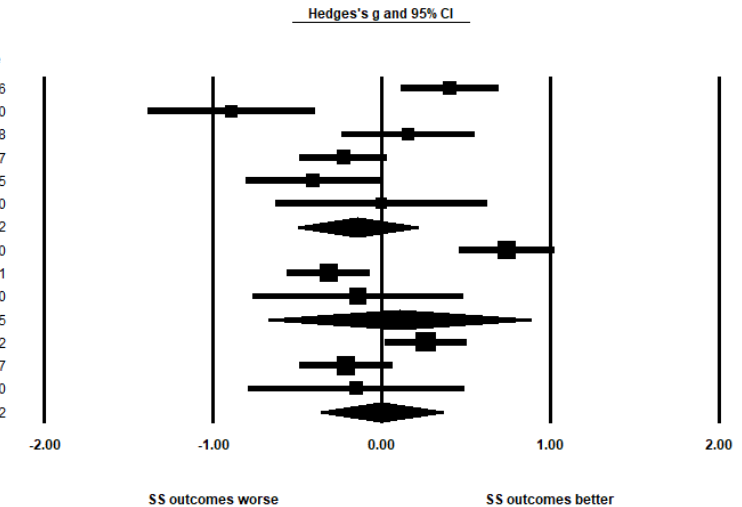

### 3g. Verbal ability / language: conservatively managed samples

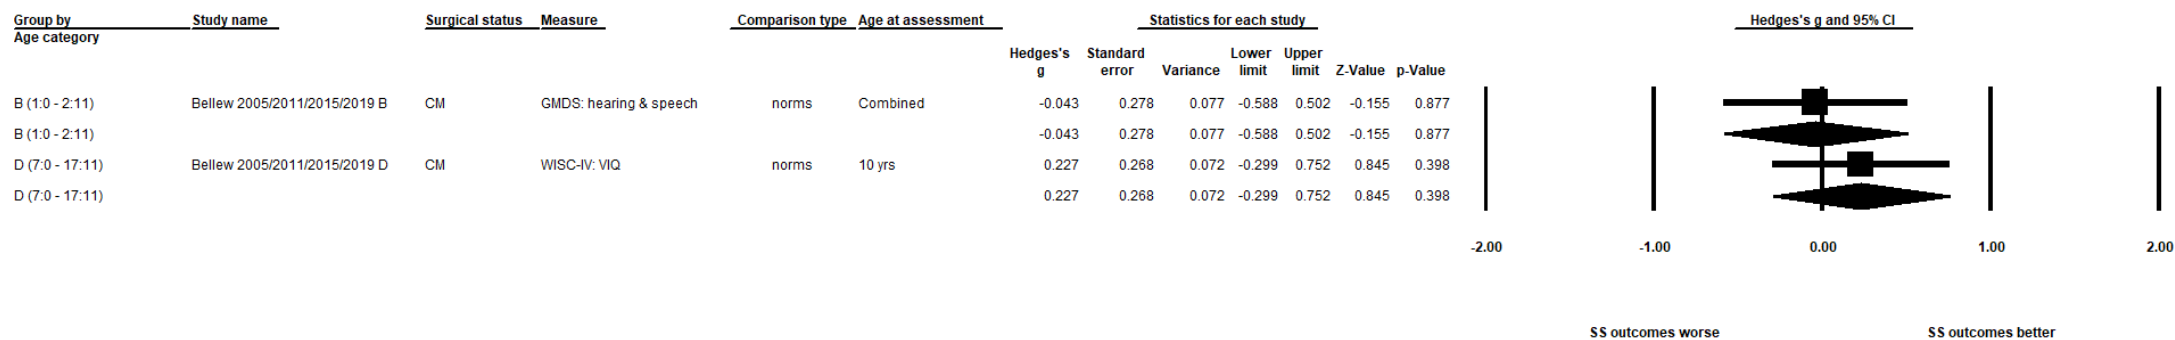

### 3h. Verbal ability / language: pre-surgical samples

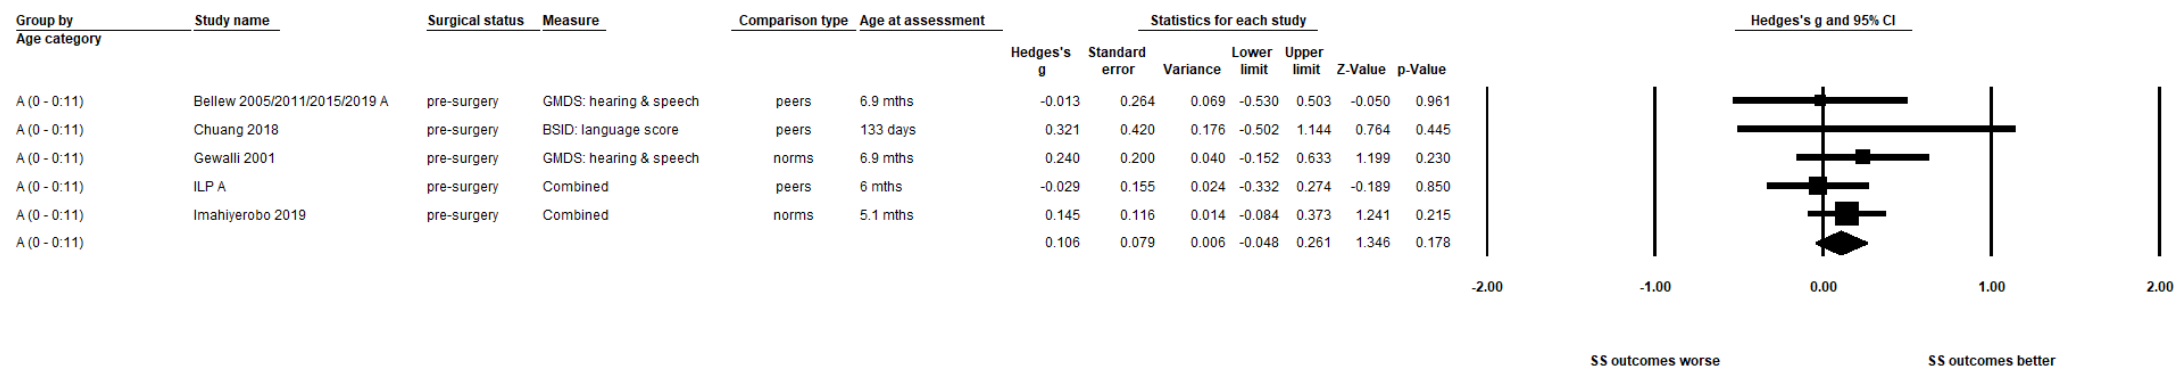

### 3i. Verbal ability / language: post-surgical samples

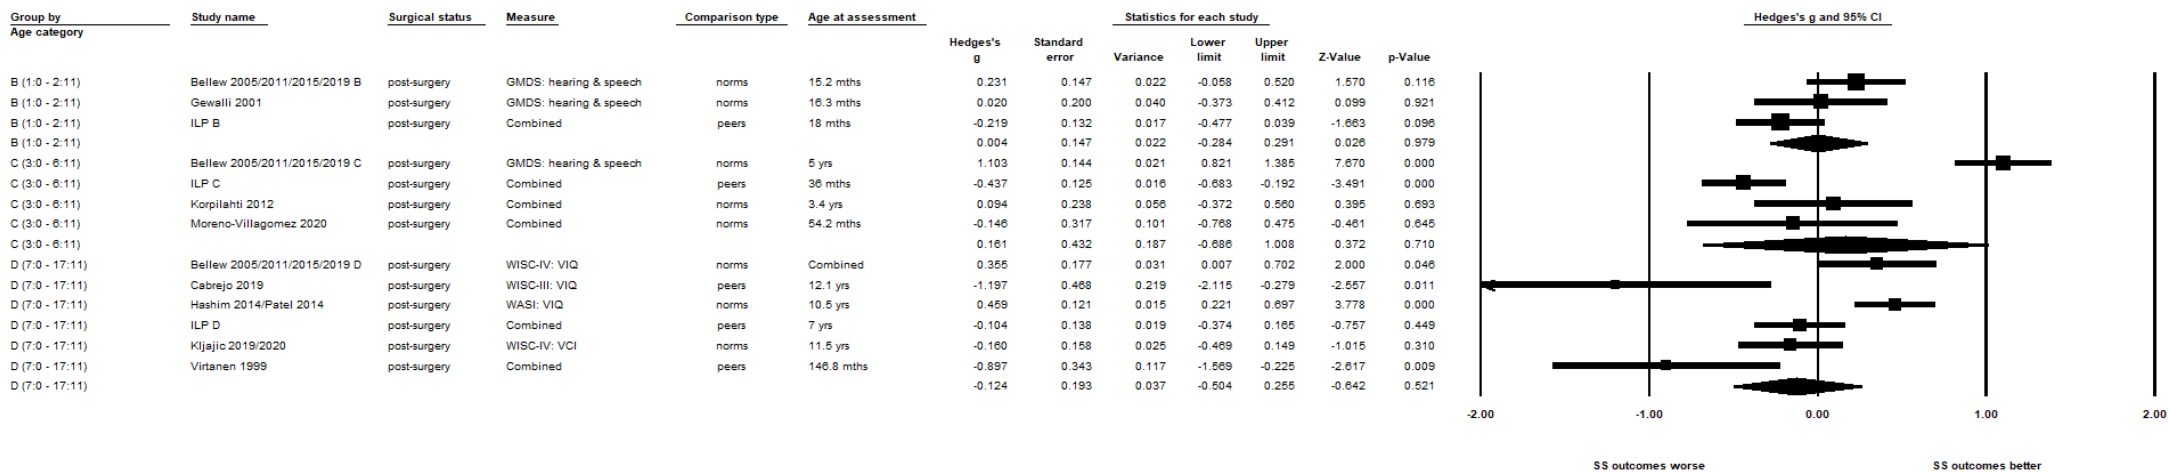

### 3j. Visuospatial ability / language: conservatively managed samples

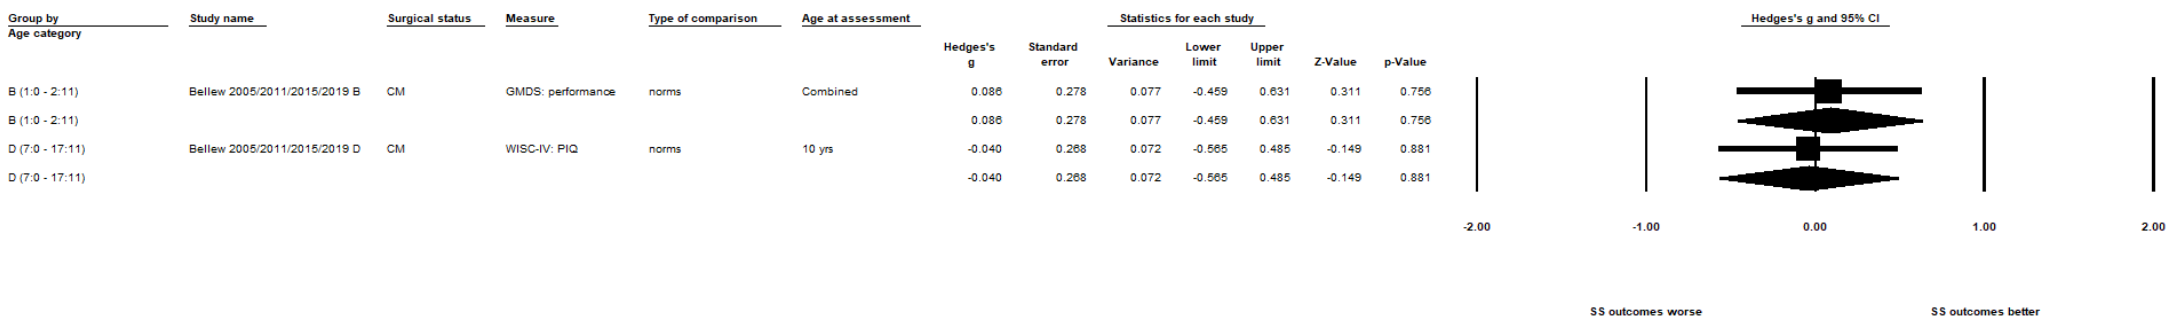



### 3k. Visuospatial ability / language: pre-surgical samples

| Group by<br>Age category | Study name                   | Surgical status | Measure           | Type of comparison | Age at assessment | Statistics for each study |                |          |             |             |         |         |
|--------------------------|------------------------------|-----------------|-------------------|--------------------|-------------------|---------------------------|----------------|----------|-------------|-------------|---------|---------|
|                          |                              |                 |                   |                    |                   | Hedges's g                | Standard error | Variance | Lower limit | Upper limit | Z-Value | p-Value |
| A (0 - 0:11)             | Bellew 2005/2011/2015/2019 A | pre-surgery     | GMDS: performance | peers              | 6.9 mths          | -0.090                    | 0.284          | 0.070    | -0.607      | 0.427       | -0.341  | 0.733   |
| A (0 - 0:11)             | Gewalli 2001                 | pre-surgery     | GMDS: performance | norms              | 6.9 mths          | 0.438                     | 0.201          | 0.040    | 0.044       | 0.831       | 2.181   | 0.029   |
| A (0 - 0:11)             |                              |                 |                   |                    |                   | 0.202                     | 0.282          | 0.069    | -0.313      | 0.716       | 0.788   | 0.442   |

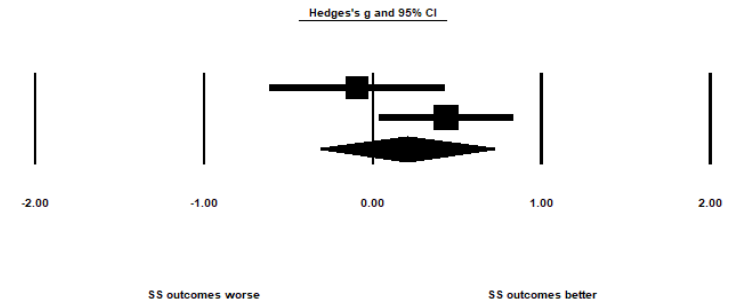

### 3l. Visuospatial ability / language: post-surgical samples

| Group by<br>Age category | Study name                   | Surgical status | Measure              | Type of comparison | Age at assessment | Statistics for each study |                |          |             |             |         |         |
|--------------------------|------------------------------|-----------------|----------------------|--------------------|-------------------|---------------------------|----------------|----------|-------------|-------------|---------|---------|
|                          |                              |                 |                      |                    |                   | Hedges's g                | Standard error | Variance | Lower limit | Upper limit | Z-Value | p-Value |
| B (1:0 - 2:11)           | Bellew 2005/2011/2015/2019 B | post-surgery    | WISC-IV: performance | norms              | 15 mths           | 0.492                     | 0.143          | 0.020    | 0.211       | 0.772       | 3.434   | 0.001   |
| B (1:0 - 2:11)           | Gewalli 2001                 | post-surgery    | GMDS: performance    | norms              | 16.3 mths         | 0.354                     | 0.201          | 0.040    | -0.039      | 0.747       | 1.763   | 0.078   |
| B (1:0 - 2:11)           |                              |                 |                      |                    |                   | 0.445                     | 0.117          | 0.014    | 0.217       | 0.673       | 3.819   | 0.000   |
| C (3:0 - 6:11)           | Bellew 2005/2011/2015/2019 C | post-surgery    | WISC-IV: performance | norms              | 60 mths           | 0.385                     | 0.143          | 0.020    | 0.105       | 0.666       | 2.692   | 0.007   |
| C (3:0 - 6:11)           | Moreno-Villagomez 2020       | post-surgery    | WPPSI-III: PIQ       | norms              | 54.2 mths         | -0.033                    | 0.317          | 0.101    | -0.655      | 0.588       | -0.105  | 0.916   |
| C (3:0 - 6:11)           |                              |                 |                      |                    |                   | 0.271                     | 0.188          | 0.035    | -0.093      | 0.636       | 1.458   | 0.145   |
| D (7:0 - 17:11)          | Bellew 2005/2011/2015/2019 D | post-surgery    | WISC-IV: PIQ         | norms              | Combined          | -0.186                    | 0.177          | 0.031    | -0.533      | 0.162       | -1.047  | 0.295   |
| D (7:0 - 17:11)          | Cabrejo 2019                 | post-surgery    | WISC-III: PIQ        | peers              | 12.1 yrs          | -0.319                    | 0.431          | 0.186    | -1.165      | 0.526       | -0.740  | 0.459   |
| D (7:0 - 17:11)          | Hashim 2014/Patel 2014       | post-surgery    | WASI: PIQ            | norms              | 10.04 yrs         | 0.486                     | 0.121          | 0.015    | 0.248       | 0.724       | 3.999   | 0.000   |
| D (7:0 - 17:11)          | ILP D                        | post-surgery    | Combined             | peers              | 7 yrs             | 0.018                     | 0.140          | 0.020    | -0.256      | 0.293       | 0.131   | 0.896   |
| D (7:0 - 17:11)          | Kijajic 2019/2020            | post-surgery    | WISC-IV: PRI         | norms              | 11.5 yrs          | 0.261                     | 0.158          | 0.025    | -0.048      | 0.570       | 1.656   | 0.098   |
| D (7:0 - 17:11)          | Virtanen 1999                | post-surgery    | WISC-R: block design | peers              | 146.8 mths        | -0.430                    | 0.330          | 0.109    | -1.077      | 0.216       | -1.304  | 0.192   |
| D (7:0 - 17:11)          |                              |                 |                      |                    |                   | 0.058                     | 0.141          | 0.020    | -0.219      | 0.334       | 0.407   | 0.684   |

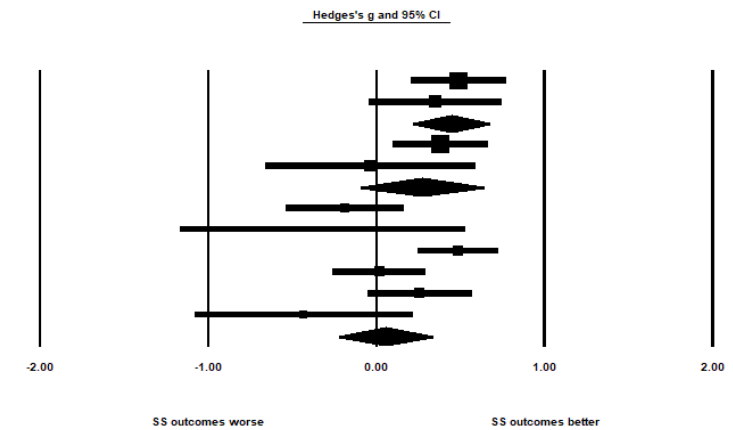

### 3m. Adaptive & social skills: conservatively managed samples

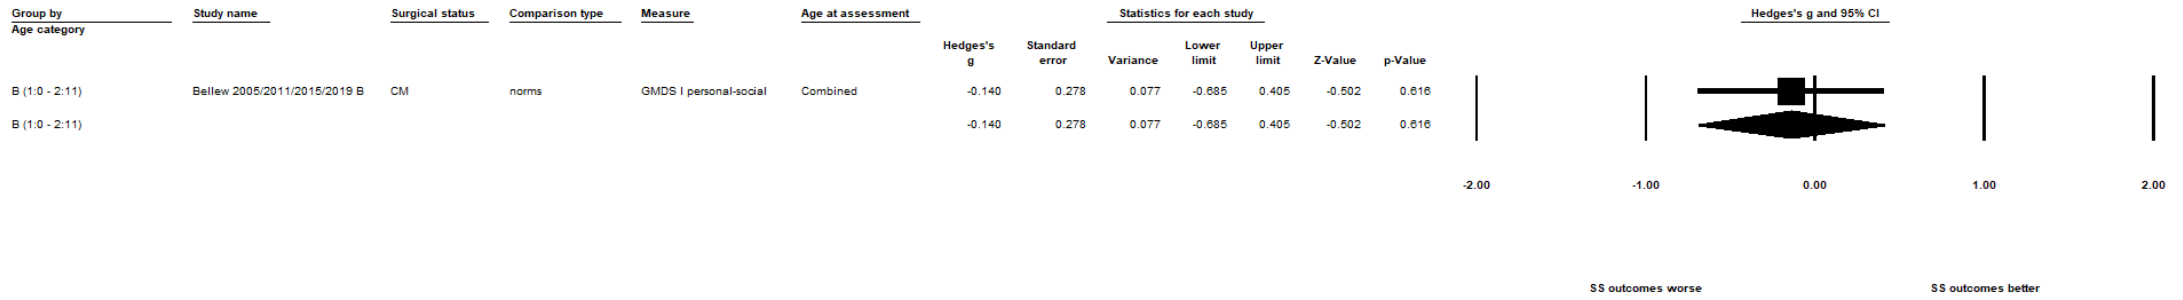

### 3n. Adaptive & social skills: pre-surgical samples

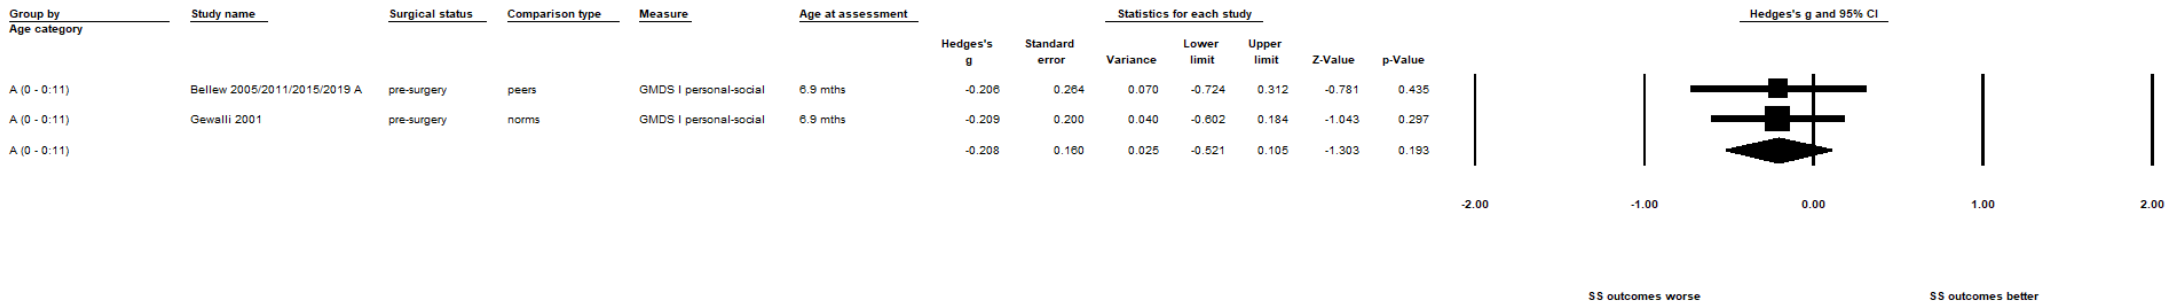

### 3o. Adaptive & social skills: post-surgical samples

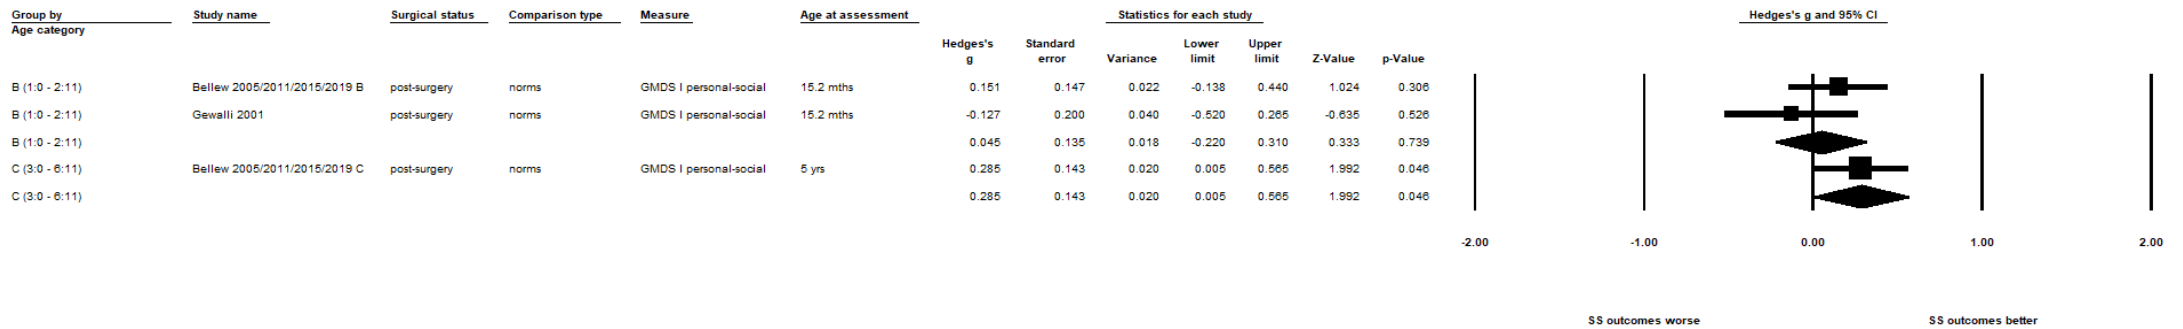



### 3r. Executive Function: post-surgical samples

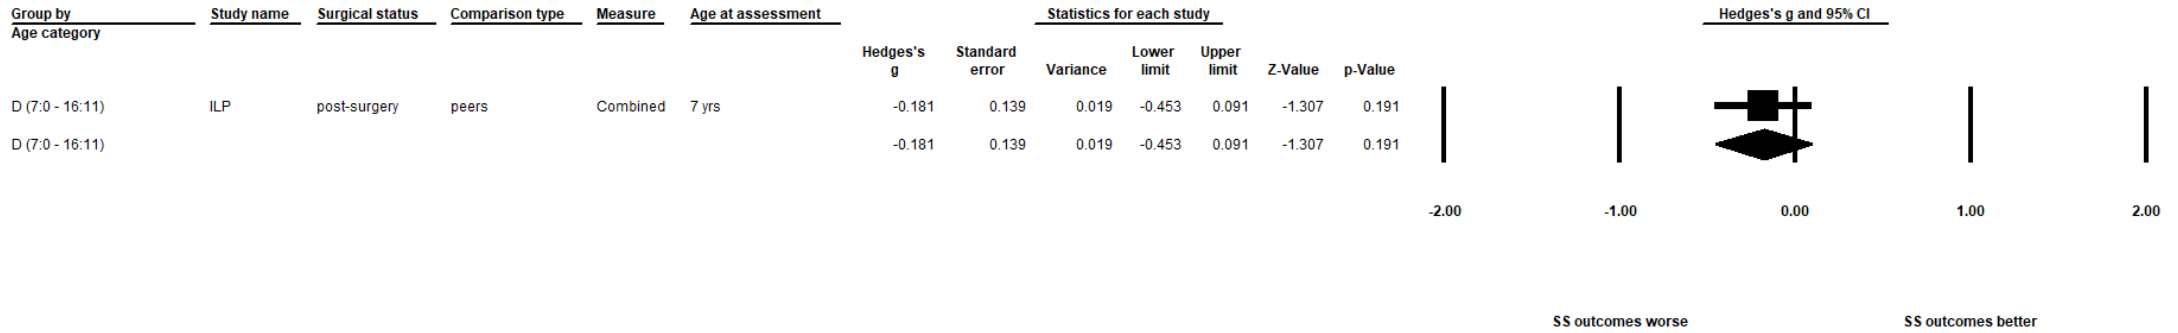

### 3s. Global development: conservatively managed samples

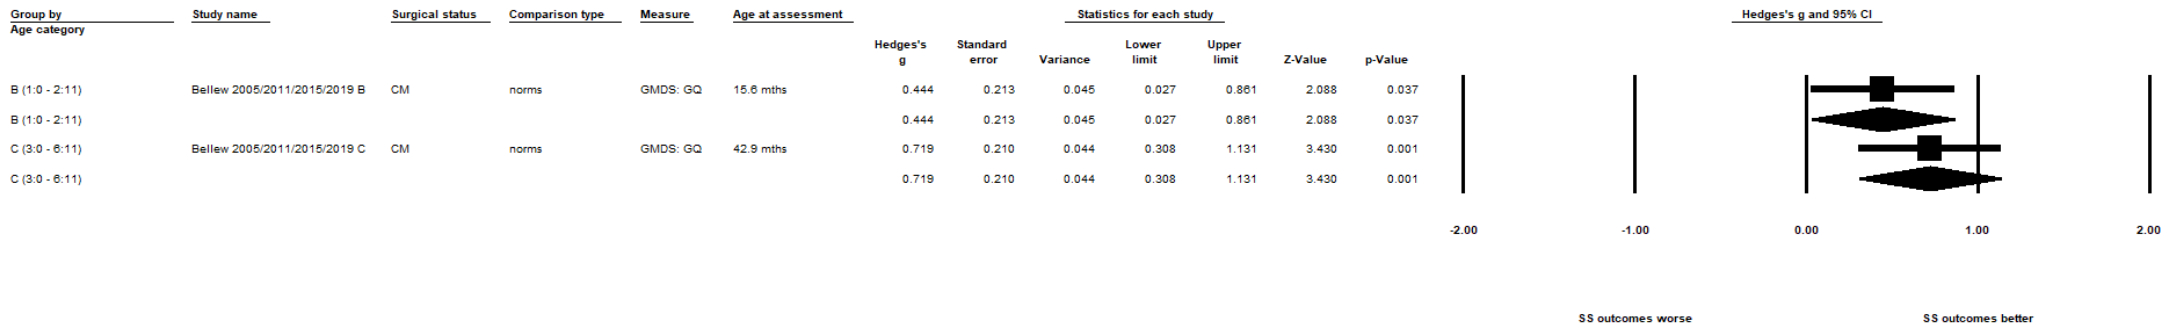

### 3t. Global development: pre-surgical samples

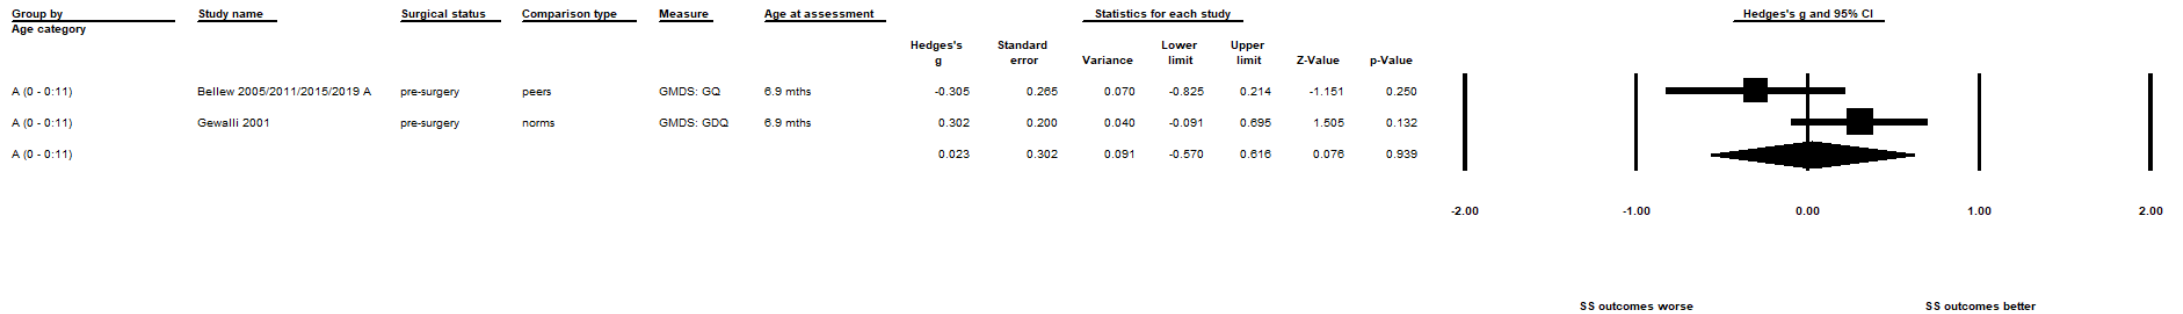

### 3u. Global development: post-surgical samples

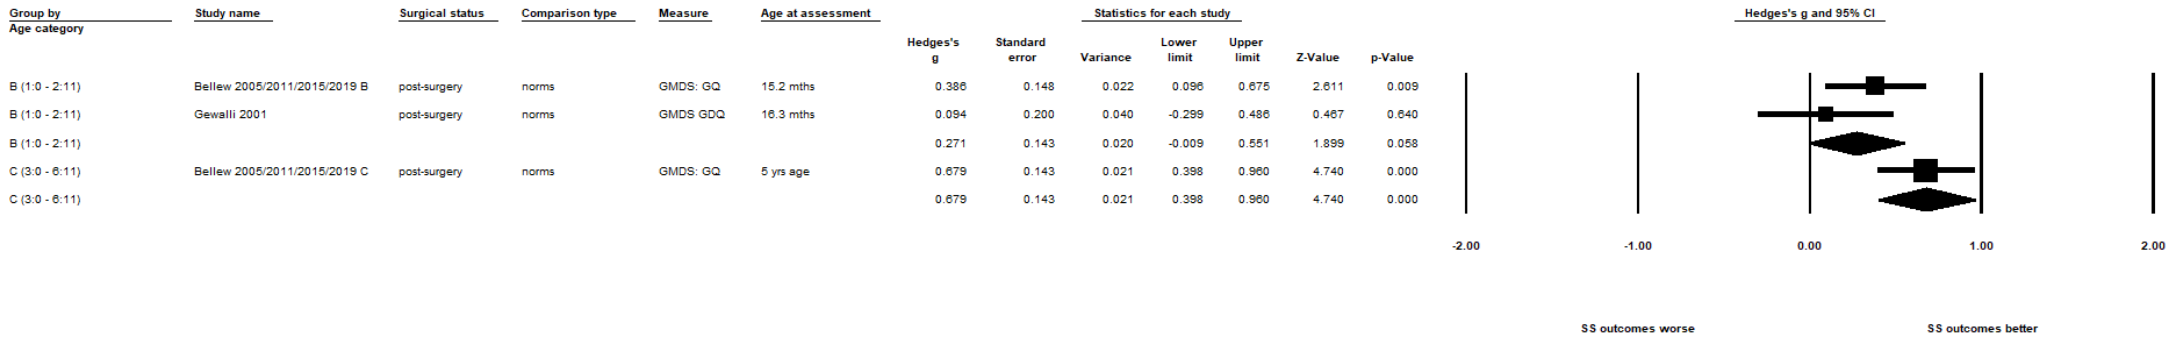

### 3v. Memory – longer-term: post-surgical samples

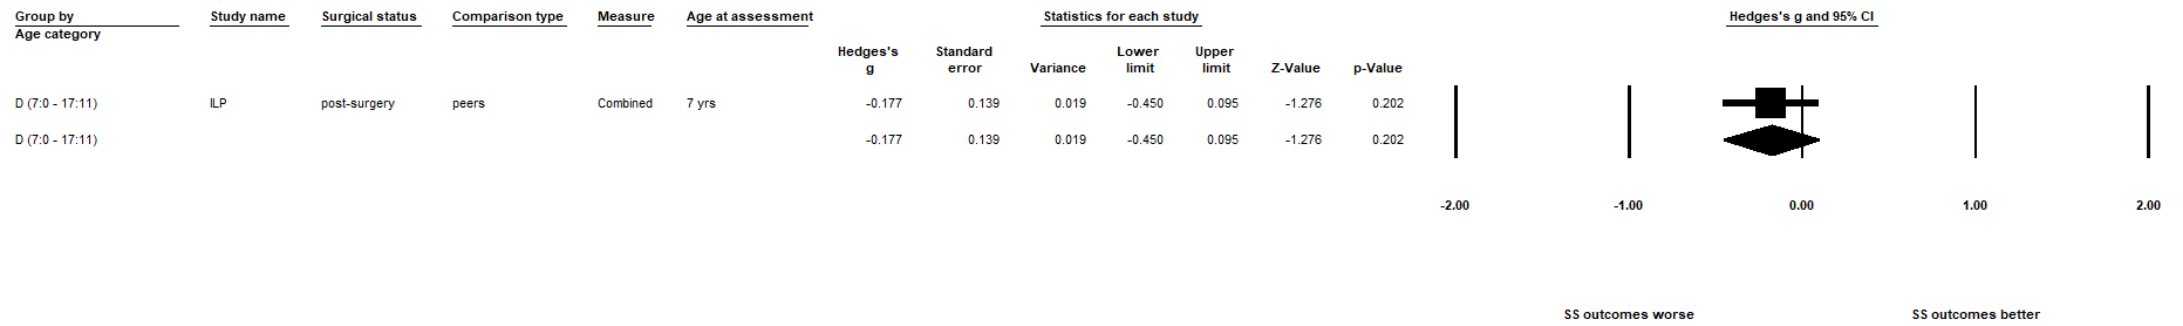

### 3w. Memory – shorter-term: post-surgical samples

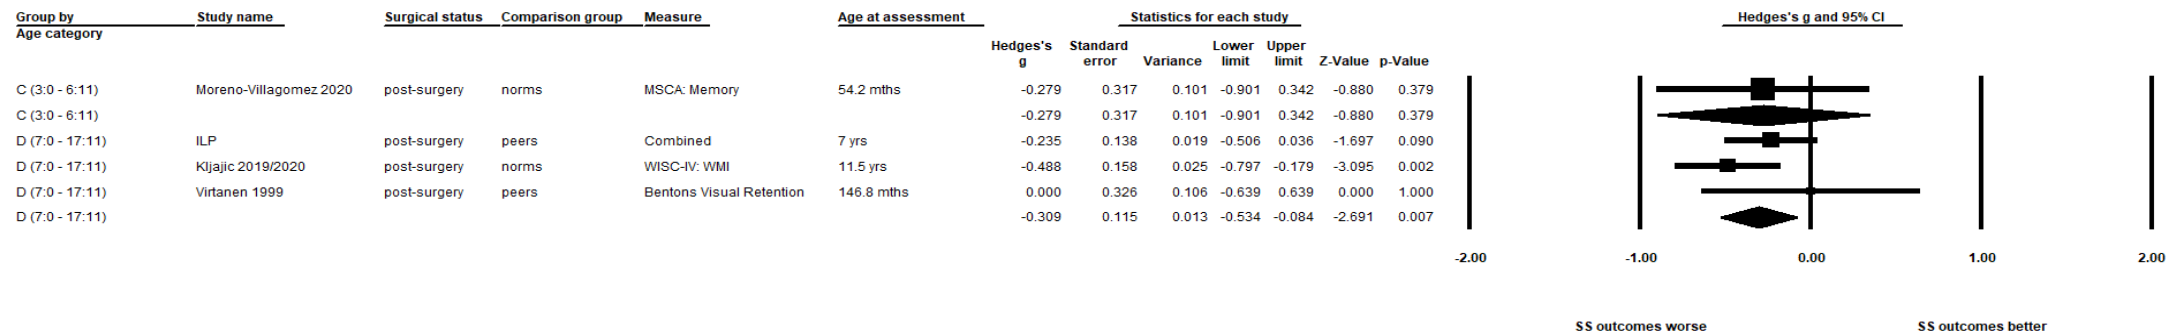



SUBJECTIVE MEASURES

3y. Behavior - externalizing: conservatively managed samples

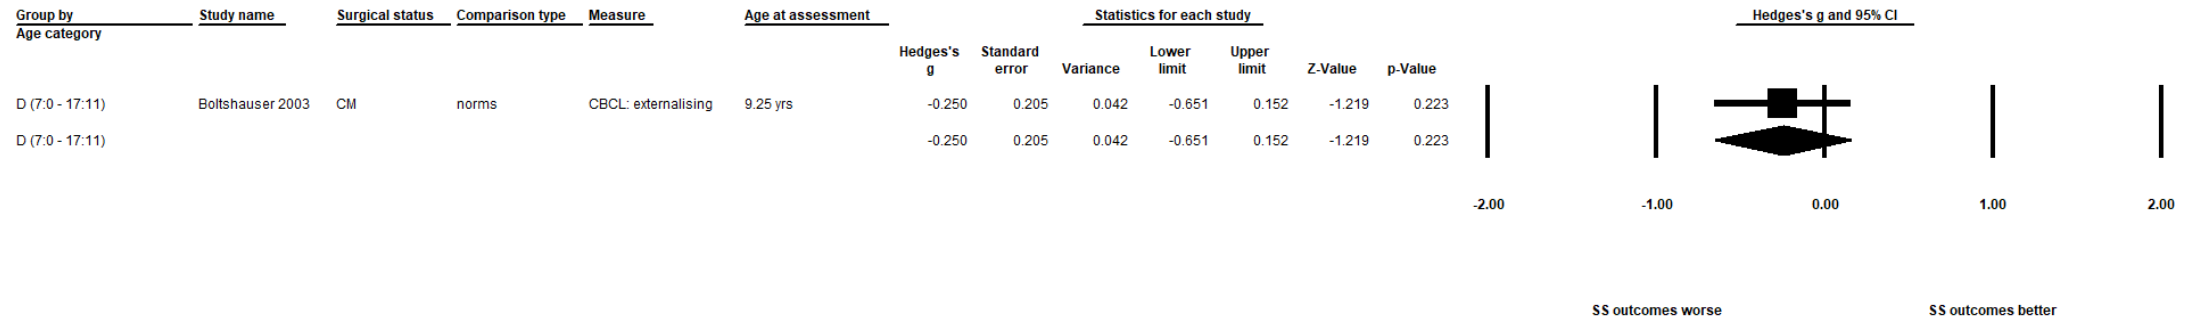

3z. Behavior - externalizing: post-surgical samples

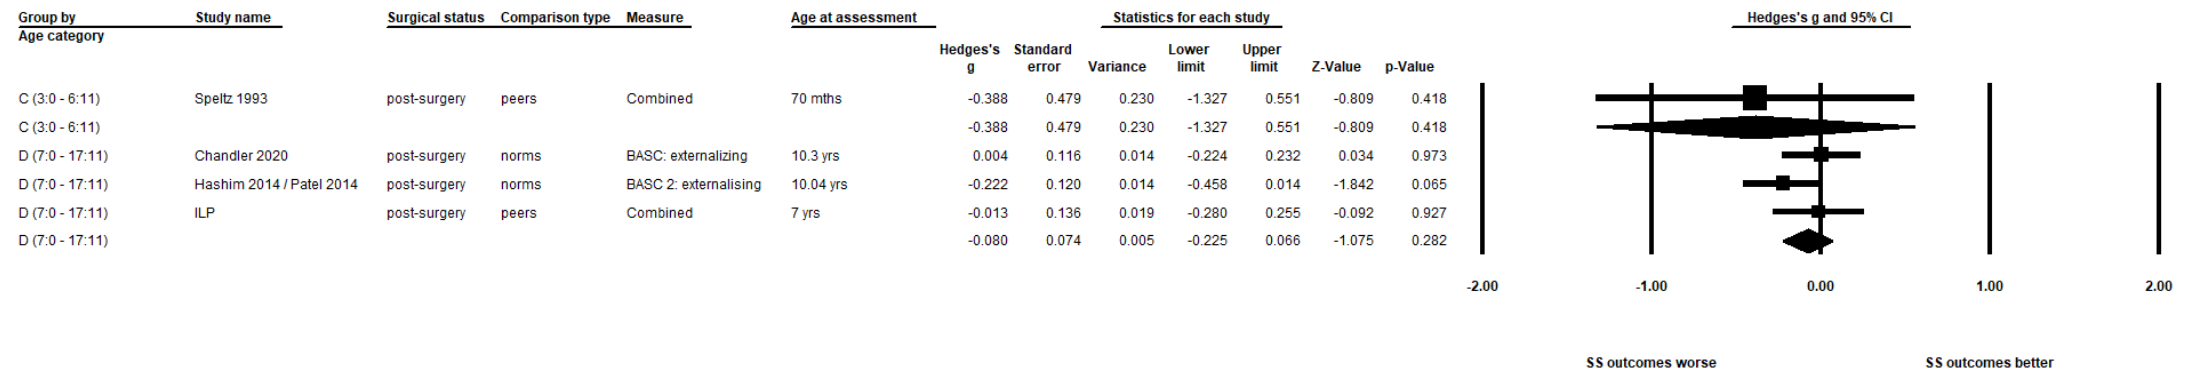

### 3aa. Behavior - internalizing: conservatively managed samples

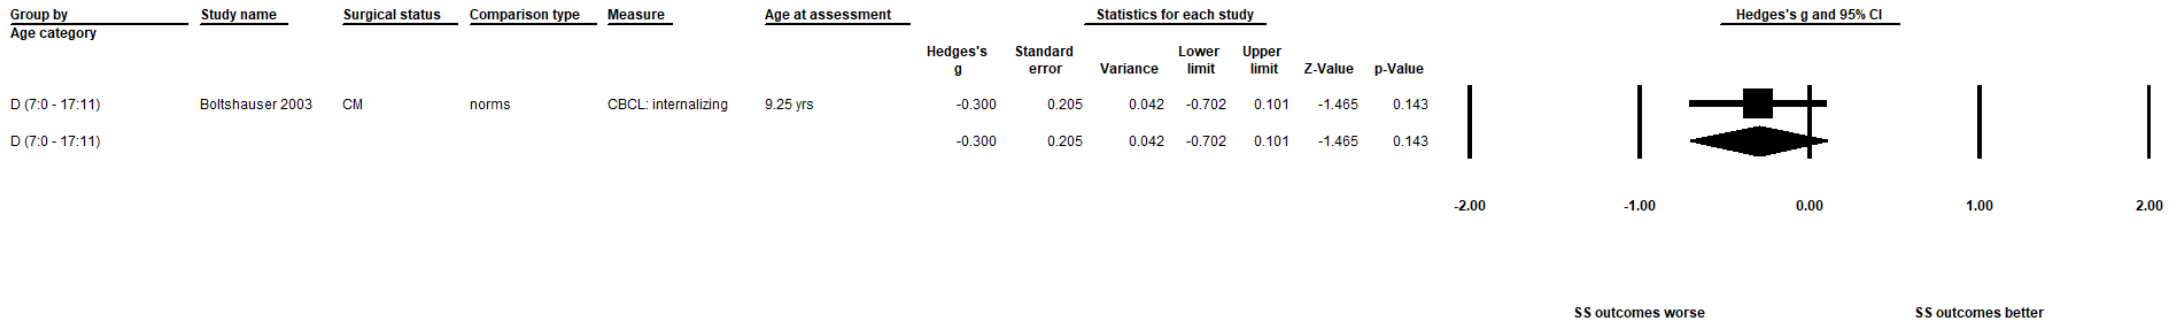

### 3ab. Behavior - internalizing: post-surgical samples

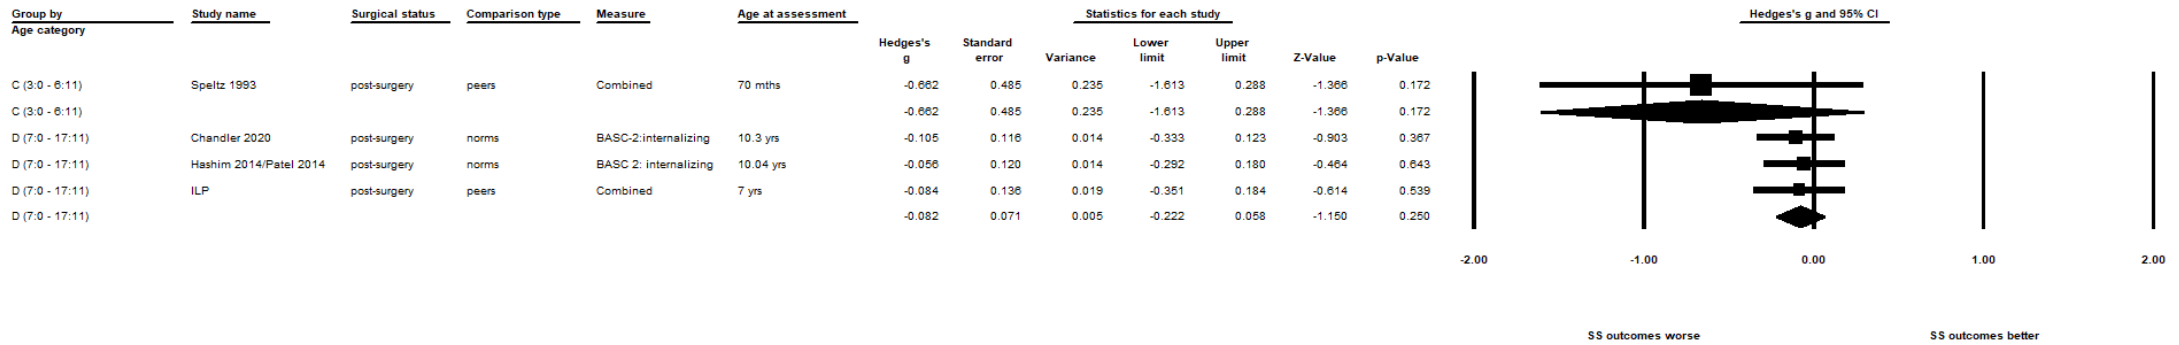

### 3ac. Behavior - total: conservatively managed samples

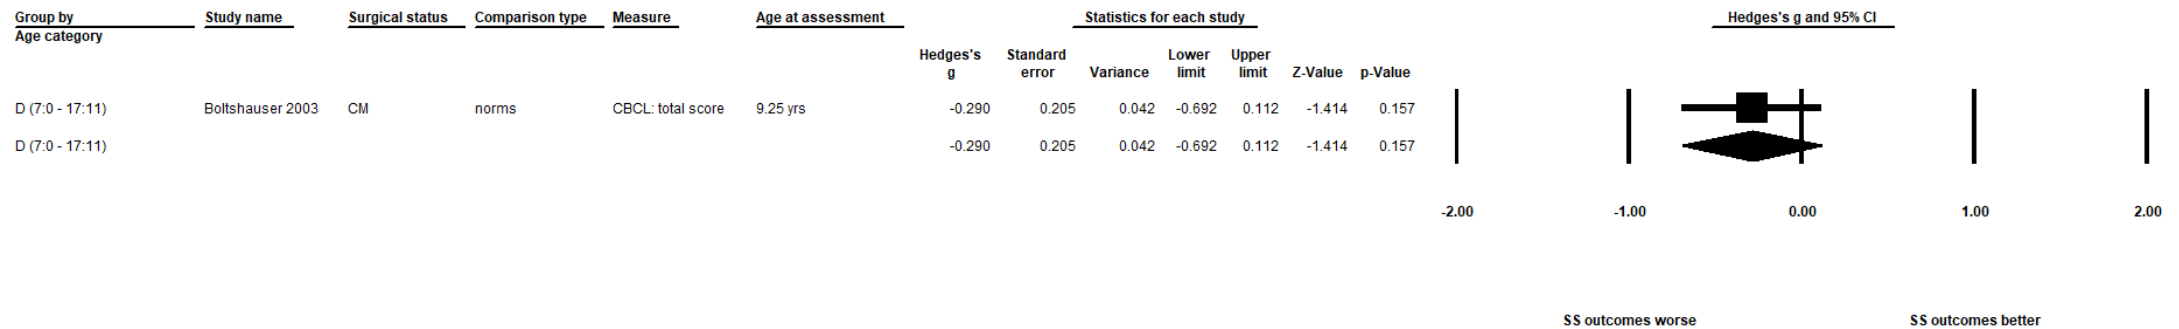



### 3ad. Behavior - total: post-surgical samples

| Group by<br>Age category | Study name    | Surgical status | Comparison type | Measure  | Age at assessment | Statistics for each study |                |          |             |             |         |         |
|--------------------------|---------------|-----------------|-----------------|----------|-------------------|---------------------------|----------------|----------|-------------|-------------|---------|---------|
|                          |               |                 |                 |          |                   | Hedges's g                | Standard error | Variance | Lower limit | Upper limit | Z-Value | p-Value |
| C (3:0 - 6:11)           | Speltz 1993   | post-surgery    | peers           | Combined | 70 mths           | 0.488                     | 0.481          | 0.231    | -0.455      | 1.431       | 1.015   | 0.310   |
| C (3:0 - 6:11)           |               |                 |                 |          |                   | 0.488                     | 0.481          | 0.231    | -0.455      | 1.431       | 1.015   | 0.310   |
| D (7:0 - 17:11)          | Chandler 2020 | post-surgery    | norms           | Combined | 10.3 yrs          | 0.171                     | 0.164          | 0.027    | -0.150      | 0.493       | 1.043   | 0.297   |
| D (7:0 - 17:11)          | ILP           | post-surgery    | peers           | Combined | 7 yrs             | -0.048                    | 0.136          | 0.019    | -0.316      | 0.219       | -0.354  | 0.723   |
| D (7:0 - 17:11)          |               |                 |                 |          |                   | 0.043                     | 0.108          | 0.012    | -0.169      | 0.254       | 0.393   | 0.694   |

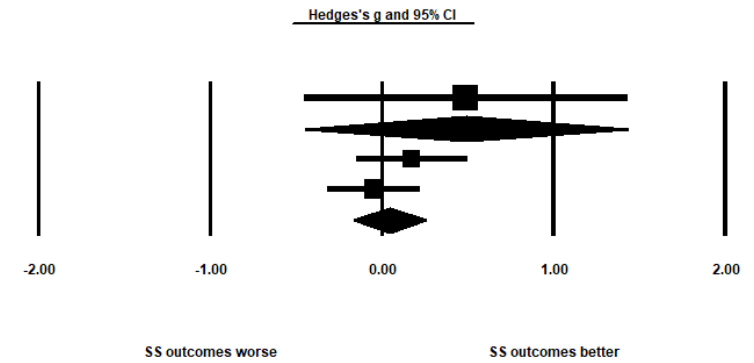

### 3ae. Executive function: post-surgical samples

| Group by<br>Age category | Study name             | Surgical status | Comparison type | Measure           | Age at assessment | Statistics for each study |                |          |             |             |         |         |
|--------------------------|------------------------|-----------------|-----------------|-------------------|-------------------|---------------------------|----------------|----------|-------------|-------------|---------|---------|
|                          |                        |                 |                 |                   |                   | Hedges's g                | Standard error | Variance | Lower limit | Upper limit | Z-Value | p-Value |
| D (7:0 - 16:11)          | Chandler 2020          | post-surgery    | norms           | BRIEF- parent GEC | 10.3 yrs          | -0.175                    | 0.118          | 0.014    | -0.407      | 0.058       | -1.474  | 0.141   |
| D (7:0 - 16:11)          | Hashim 2014/Patel 2014 | post-surgery    | norms           | BRIEF: GEC        | 10.04 yrs         | -0.598                    | 0.123          | 0.015    | -0.839      | -0.357      | -4.869  | 0.000   |
| D (7:0 - 16:11)          | ILP                    | post-surgery    | peers           | Combined          | 7 yrs             | 0.039                     | 0.149          | 0.022    | -0.253      | 0.331       | 0.264   | 0.792   |
| D (7:0 - 16:11)          |                        |                 |                 |                   |                   | -0.251                    | 0.184          | 0.034    | -0.611      | 0.110       | -1.364  | 0.173   |

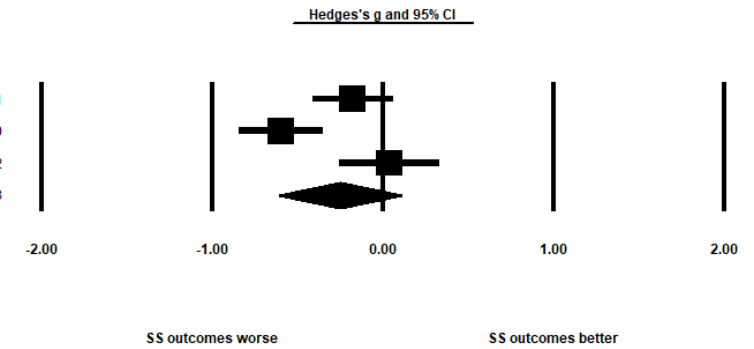

### 3af. Memory – shorter-term: post-surgical samples

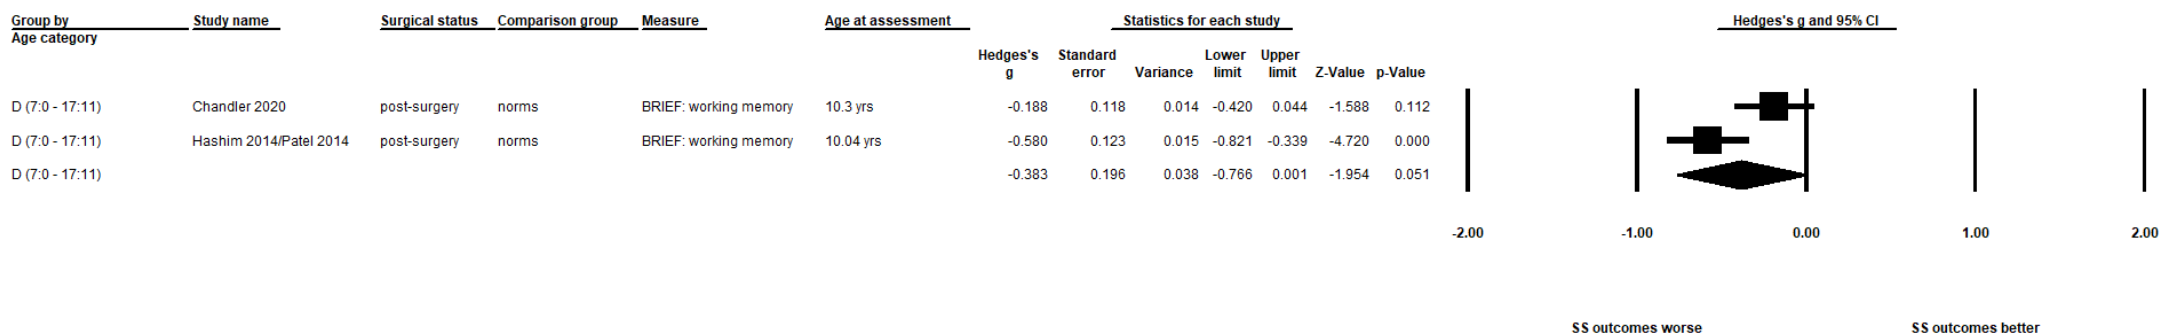

### 3ag. Quality of life: conservatively managed samples

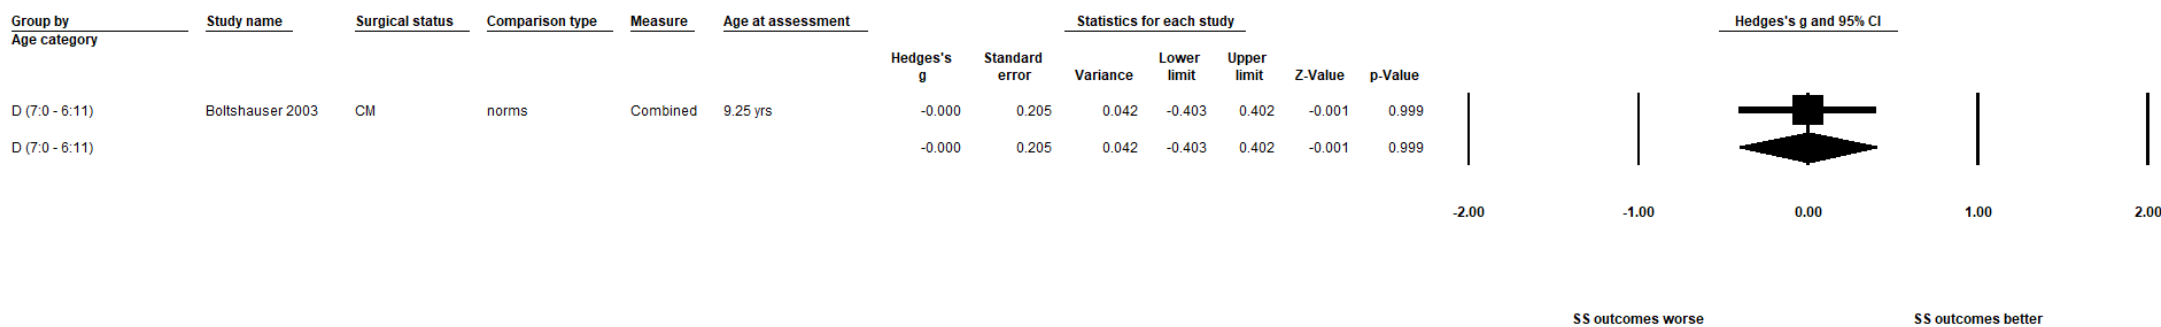

### 3ah. Quality of life: post-surgical samples

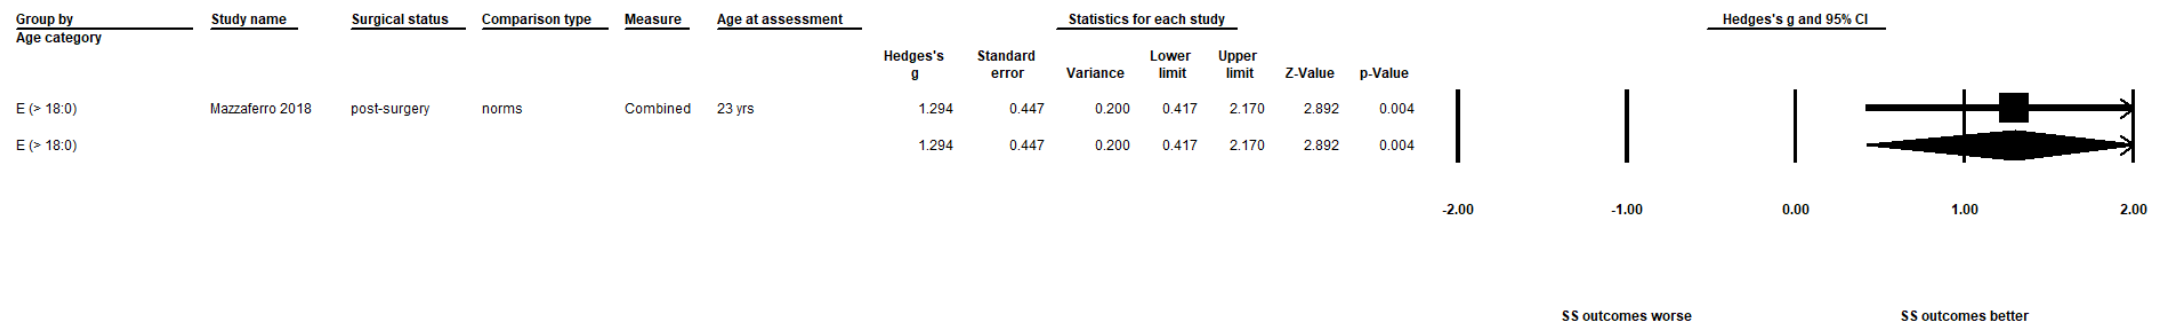

### 3ai. Satisfaction with appearance: post-surgical samples

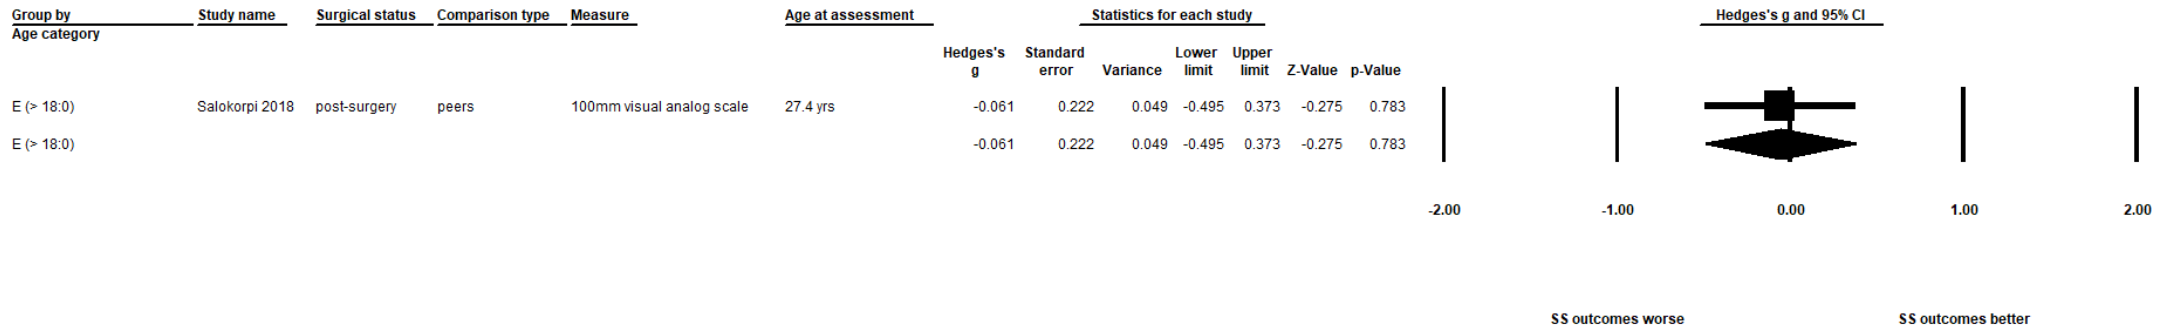

### 3aj. Self-concept: post-surgical samples

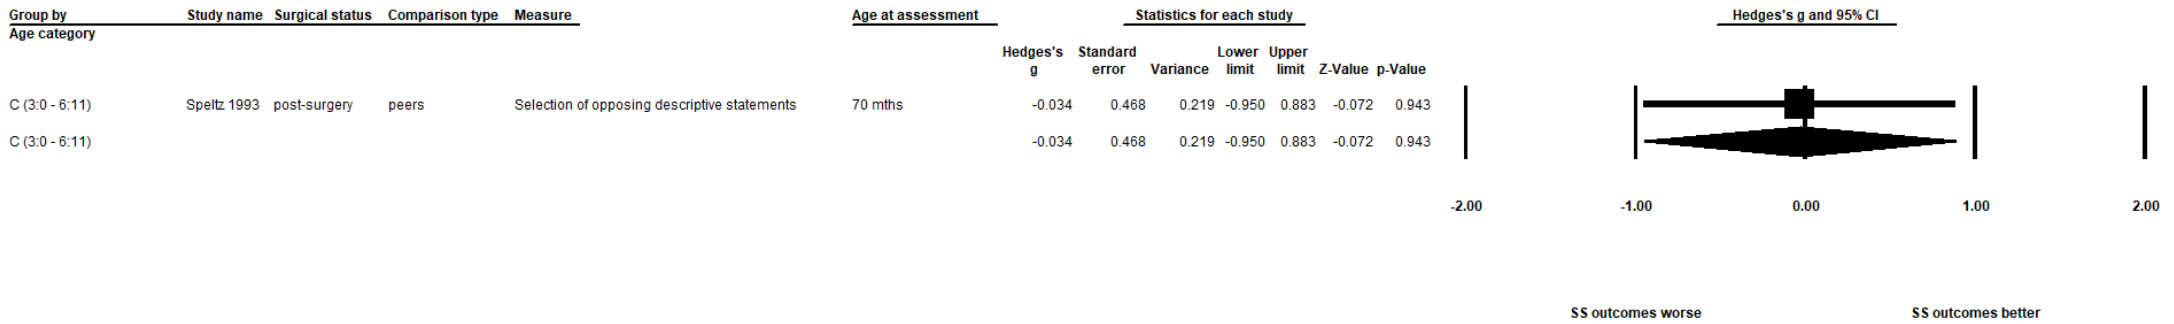

### eFigure 3

Pooled analyses for each cognitive, behavioral and psychological domain, partitioned according to surgical status (conservatively managed, presurgical, postsurgical) and age at assessment: A (0 – 0:11); B (1:0 – 2:11); C (3:0 – 6:11); D (7:0 – 17:11); E (>18:0)

Note: ILP = Infant Learning Project

## eReferences

1. Arnaud E, Renier D, Marchac D. Prognosis for mental function in scaphocephaly. *Journal of Neurosurgery*. 1995;83(3):476-479.
2. Bellew M, Chumas P, Mueller R, Liddington M, Russell J. Pre- and postoperative developmental attainment in sagittal synostosis. *Archives of Disease in Childhood*. 2005;90(4):346-350.
3. Bellew M, Liddington M, Chumas P, Russell J. Preoperative and postoperative developmental attainment in patients with sagittal synostosis: 5-Year follow-up. *Journal of Neurosurgery: Pediatrics*. 2011;7(2):121-126.
4. Bellew M, Chumas P. Long-term developmental follow-up in children with nonsyndromic craniosynostosis. *Journal of Neurosurgery: Pediatrics*. 2015;16(4):445-451.
5. Bellew M, Mandela RJ, Chumas PD. Impact of age at surgery on neurodevelopmental outcomes in sagittal synostosis. *Journal of Neurosurgery: Pediatrics*. 2019;23(4):434-441.
6. Boltshauser E, Ludwig S, Dietrich F, Landolt MA. Sagittal Craniosynostosis: Cognitive Development, Behaviour, and Quality of Life in Unoperated Children. *Neuropediatrics*. 2003;34(6):293-300.
7. Byun IH, Hong JW, Hussein MA, Kim YO. Demographic characteristics of craniosynostosis patients in Asia. *Journal of Cranio-Maxillofacial Surgery*. 2018;46(4):674-678.
8. Cabrejo R, Lacadie C, Brooks E, et al. Understanding the learning disabilities linked to sagittal craniosynostosis. *Journal of Craniofacial Surgery*. 2019;30(2):497-502.
9. Care H, Horton J, Kearney A, et al. Introduction to the craniofacial collaboration UK: A developmental screening protocol at the United Kingdom's four highly specialized craniofacial centers. *Journal of Craniofacial Surgery*. 2019;30(1):83-86.
10. Chandler L, Allam O, Park KE, et al. Spring-Assisted Strip Craniectomy Versus Cranial Vault Remodeling: Long-Term Psychological, Behavioral, and Executive Function Outcomes. *Journal of Craniofacial Surgery*. 2020;31(7):2101-2105.
11. Chieffo D, Tamburrini G, Massimi L, et al. Long-term neuropsychological development in single-suture craniosynostosis treated early: Clinical article. *Journal of Neurosurgery: Pediatrics*. 2010;5(3):232-237.
12. Chieffo D, Arcangeli V, Bianchi F, et al. Single-suture craniosynostosis: is there a correlation between preoperative ophthalmological, neuroradiological, and neurocognitive findings? *Child's Nervous System*. 2020.
13. Chuang C, Rolison M, Yang JF, et al. Normalization of Speech Processing after Whole-Vault Cranioplasty in Sagittal Synostosis. *Journal of Craniofacial Surgery*. 2018;29(5):1132-1136.
14. Chuang C, Chaunzwa TL, Wu R, et al. Long-term neurocognitive outcomes in sagittal synostosis: The impact of reoperation. *Journal of Craniofacial Surgery*. 2021;32(1):58-61.
15. Da Costa AC, Walters I, Savarirayan R, Anderson VA, Wrennall JA, Meara JG. Intellectual outcomes in children and adolescents with syndromic and nonsyndromic craniosynostosis. *Plastic and Reconstructive Surgery*. 2006;118(1):175-181.
16. Da Costa AC, Anderson VA, Savarirayan R, et al. Neurodevelopmental functioning of infants with untreated single-suture craniosynostosis during early infancy. *Child's Nervous System*. 2012;28(6):869-877.
17. Da Costa AC, Anderson VA, Holmes AD, et al. Longitudinal study of the neurodevelopmental characteristics of treated and untreated nonsyndromic craniosynostosis in infancy. *Child's Nervous System*. 2013;29(6):985-995.
18. Engel M, Hoffmann J, Mühling J, Castrillón-Oberndorfer G, Seeberger R, Freudlsperger C. Subtotal cranial vault remodelling in anterior sagittal suture closure: Impact of age on surgical outcome. *International Journal of Oral and Maxillofacial Surgery*. 2012;41(10):1232-1237.

19. Gewalli F, Da Silva Guimarães-Ferreira JP, Sahlin P, et al. Mental development after modified  $\pi$  procedure: Dynamic cranioplasty for sagittal synostosis. *Annals of Plastic Surgery*. 2001;46(4):415-420.
20. Hashim PW, Patel A, Yang JF, et al. The effects of whole-vault cranioplasty versus strip craniectomy on long-term neuropsychological outcomes in sagittal craniosynostosis. *Plastic and reconstructive surgery*. 2014;134(3):491-501.
21. Patel A, Yang JF, Hashim PW, et al. The impact of age at surgery on long-term neuropsychological outcomes in sagittal craniosynostosis. *Plast Reconstr Surg*. 2014;134(4):608e-617e.
22. Imahiyerobo TA, Johns AL, Christian EA, et al. Risk factors for preoperative developmental delay in patients with nonsyndromic sagittal craniosynostosis. *Plastic and Reconstructive Surgery*. 2019;143(1):133E-139E.
23. Kapp-Simon KA, Leroux B, Cunningham M, Speltz ML. Multisite study of infants with single-suture craniosynostosis: Preliminary report of presurgery development. *Cleft Palate-Craniofacial Journal*. 2005;42(4):377-384.
24. Ruiz-Correa S, Starr JR, Lin HJ, Kapp-Simon KA, Cunningham ML, Speltz ML. Severity of skull malformation is unrelated to presurgery neurobehavioral status of infants with sagittal synostosis. *Cleft Palate-Craniofacial Journal*. 2007;44(5):548-554.
25. Speltz ML, Kapp-Simon K, Collett B, et al. Neurodevelopment of infants with single-suture craniosynostosis: Presurgery comparisons with case-matched controls. *Plastic and Reconstructive Surgery*. 2007;119(6):1874-1881.
26. Starr JR, Kapp-Simon KA, Cloonan YK, et al. Presurgical and postsurgical assessment of the neurodevelopment of infants with single-suture craniosynostosis: Comparison with controls. *Journal of Neurosurgery*. 2007;107(2 SUPPL.):103-110.
27. Toth K, Collett B, Kapp-Simon KA, et al. Memory and response inhibition in young children with single-suture craniosynostosis. *Child Neuropsychology*. 2008;14(4):339-352.
28. Naumann HL, Haberkern CM, Pietila KE, et al. Duration of exposure to cranial vault surgery: Associations with neurodevelopment among children with single-suture craniosynostosis. *Paediatric Anaesthesia*. 2012;22(11):1053-1061.
29. Starr JR, Collett BR, Gaither R, et al. Multicenter study of neurodevelopment in 3-year-old children with and without single-suture craniosynostosis. *Archives of Pediatrics and Adolescent Medicine*. 2012;166(6):536-542.
30. Cradock MM, Gray KE, Kapp-Simon KA, Collett BR, Buono LA, Speltz ML. Sex differences in the neurodevelopment of school-age children with and without single-suture craniosynostosis. *Child's Nervous System*. 2015;31(7):1103-1111.
31. Speltz ML, Birgfeld C, Starr JR, Collett B, Kapp-Simon K. The effects of whole-vault cranioplasty versus strip craniectomy on long-term neuropsychological outcomes in sagittal craniosynostosis. *Plastic and Reconstructive Surgery*. 2015;135(3):646e-647e.
32. Speltz ML, Collett BR, Wallace ER, Kapp-Simon K. Behavioral adjustment of school-age children with and without single-suture craniosynostosis. *Plastic and Reconstructive Surgery*. 2016;138(2):435-445.
33. Kapp-Simon KA, Wallace E, Collett BR, Cradock MM, Crerand CE, Speltz ML. Language, learning, and memory in children with and without single-suture craniosynostosis. *Journal of Neurosurgery: Pediatrics*. 2016;17(5):578-588.
34. Collett BR, Kapp-Simon KA, Wallace E, Cradock MM, Buono L, Speltz ML. Attention and executive function in children with and without single-suture craniosynostosis. *Child Neuropsychology*. 2017;23(1):83-98.
35. Wallace ER, Collett BR, Kapp-Simon K, Starr JR, Birgfeld C, Speltz ML. Visuomotor Function in School-Age Children with Single-Suture Craniosynostosis. *Journal of Developmental and Behavioral Pediatrics*. 2016;37(6):483-490.

36. Kapp-Simon KA, Figueroa A, Jocher CA, Schafer M. Longitudinal assessment of mental development in infants with nonsyndromic craniosynostosis with and without cranial release and reconstruction. *Plastic and Reconstructive Surgery*. 1993;92(5):831-839.
37. Kapp-Simon KA. Mental development and learning disorders in children with single suture craniosynostosis. *Cleft Palate-Craniofacial Journal*. 1998;35(3):197-203.
38. Kljajić M, Maltese G, Tarnow P, Sand P, Kölby L. The Cognitive Profile of Children with Nonsyndromic Craniosynostosis. *Plastic and Reconstructive Surgery*. 2019;143(5):1037e-1052e.
39. Kljajić M, Maltese G, Tarnow P, Sand P, Kölby L. Sustained attention and vigilance of children treated for sagittal and metopic craniosynostosis. *Child Neuropsychology*. 2020;26(4):475-488.
40. Korpilahti P, Saarinen P, Hukki J. Deficient language acquisition in children with single suture craniosynostosis and deformational posterior plagiocephaly. *Child's Nervous System*. 2012;28(3):419-425.
41. Lee MC, Shim KW, Park EK, Yun IS, Kim DS, Kim YO. Expansion and compression distraction osteogenesis based on volumetric and neurodevelopmental analysis in sagittal craniosynostosis. *Child's Nervous System*. 2015;31(11):2081-2089.
42. Lee MC, Shim KW, Yun IS, Park EK, Kim YO. Correction of Sagittal Craniosynostosis Using Distraction Osteogenesis Based on Strategic Categorization. *Plastic and Reconstructive Surgery*. 2017;139(1):157-169.
43. Magge SN, Westerveld M, Pruzinsky T, Persing JA. Long-term neuropsychological effects of sagittal craniosynostosis on child development. *Journal of Craniofacial Surgery*. 2002;13(1):99-104.
44. Mazzaferro DM, Naran S, Wes AM, Magee L, Taylor JA, Bartlett SP. Quality of life in adults with nonsyndromic craniosynostosis. *Plastic and Reconstructive Surgery*. 2018;141(6):1474-1482.
45. Moreno-Villagómez J, Yáñez-Télez G, Prieto-Corona B, Seubert-Ravelo AN, García A. Cognitive performance of preschool children with different types of non-syndromic craniosynostosis. *Brain Impairment*. 2020:1-10.
46. Noetzel MJ, Marsh JL, Palkes H, Gado M. Hydrocephalus and mental retardation in craniosynostosis. *The Journal of Pediatrics*. 1985;107(6):885-892.
47. Salokorpi N, Savolainen T, Sinikumpu JJ, et al. Outcomes of 40 Nonsyndromic Sagittal Craniosynostosis Patients as Adults: A Case-Control Study with 26 Years of Postoperative Follow-up. *Operative Neurosurgery*. 2019;16(1):1-8.
48. Scheuerle J, Guilford AM, Habal MB. A Report of Behavioral Data on Three Groups of Patients With Craniofacial Disorders. *Journal of Craniofacial Surgery*. 2004;15(2):200-208.
49. Shipster C, Hearst D, Somerville A, Stackhouse J, Hayward R, Wade A. Speech, language, and cognitive development in children with isolated sagittal synostosis. *Developmental Medicine and Child Neurology*. 2003;45(1):34-43.
50. Speltz ML, Morton K, Goodell EW, Clarren SK. Psychological functioning of children with craniofacial anomalies and their mothers: Follow-up from late infancy to school entry. *Cleft Palate-Craniofacial Journal*. 1993;30(5):482-489.
51. Speltz ML, Endriga MC, Mouradian WE. Presurgical and postsurgical mental and psychomotor development of infants with sagittal synostosis. *Cleft Palate-Craniofacial Journal*. 1997;34(5):374-379.
52. Virtanen R, Korhonen T, Fagerholm J, Viljanto J. Neurocognitive sequelae of scaphocephaly. *Pediatrics*. 1999;103(4 I):791-795.
53. Care H, Kennedy-Williams P, Cunliffe A, et al. Preliminary Analysis From the Craniofacial Collaboration United Kingdom Developmental Outcomes in Children With Sagittal Synostosis. *Journal of Craniofacial Surgery*. 2019;30(6):1740-1744.

54. Salokorpi N, Savolainen T, Sinikumpu JJ, Pirttiniemi P, Serlo W. Non-syndromic craniosynostosis patients operated between 1978 and 2000. How do they do as adults? *Child's Nervous System*. 2018;34(10):2031.
